# Supplementary material
Source: PubMed Central journal article supplement (PMC8814676)
Supplement: bloodBLD2021011802-suppl1.pdf [file bloodBLD2021011802-suppl1.pdf]

**Supplementary information for:**

**MS4A3 Promotes Differentiation in Chronic Myeloid Leukemia Cells by Enhancing  
Common  $\beta$  Chain Cytokine Receptor Endocytosis**

**Author list:**

Helong Zhao<sup>1§</sup>, Anthony D. Pomicter<sup>1</sup>, Anna M. Eiring<sup>2</sup>, Anca Franzini<sup>1</sup>, Jonathan Ahmann<sup>1</sup>, Jae-Yeon Hwang<sup>3</sup>, Anna Senina<sup>1</sup>, Bret Helton<sup>4</sup>, Siddharth Iyer<sup>1</sup>, Dongqing Yan<sup>1</sup>, Jamshid S. Khorashad<sup>5</sup>, Matthew S. Zabriskie<sup>1</sup>, Anupriya Agarwal<sup>6</sup>, Hannah M. Redwine<sup>1</sup>, Amber D. Bowler<sup>1</sup>, Phillip M. Clair<sup>1</sup>, Shannon K. McWeeney<sup>6</sup>, Brian J. Druker<sup>6</sup>, Jeffrey W. Tyner<sup>6</sup>, Derek L. Stirewalt<sup>7</sup>, Vivian G. Oehler<sup>7</sup>, Sooryanarayana Varambally<sup>8</sup>, Kristofer C. Berrett<sup>1</sup>, Jeffery M. Vahrenkamp<sup>1</sup>, Jason Gertz<sup>3</sup>, Katherine E. Varley<sup>3</sup>, Gerald P. Radich<sup>7</sup>, Michael W. Deininger<sup>1,9§</sup>

## SUPPLEMENTARY FIGURE LEGENDS

**Figure S1. Expression of resistance classifier genes in CD34<sup>+</sup> cells from AP/BP-CML versus CP-CML patients.** Relative mRNA expression for twenty genes with differential expression in CML disease progression and/or imatinib resistance were selected for validation by qRT-PCR in CD34<sup>+</sup> cells from an independent cohort of patients with AP/BP-CML (n=16) vs. CP-CML (n=17). (\*p<0.05)

**Figure S2. Myeloid-specific expression of the six-gene set from the combined meta-analysis.** Hierarchical trees were generated with the BloodSpot online tool (<http://servers.binf.ku.dk/bloodspot/>) using the normal hematopoiesis vs. acute myeloid leukemia comparison.

**Figure S3. Lentivirus-mediated *MS4A3* KD and overexpression, as well as their effect on colony formation by normal adult BM CD34<sup>+</sup> cells. (A-B)** Relative *MS4A3* expression in LAMA-84 CML cell line **(A)** and in CD34<sup>+</sup> cells from a CP-CML patient **(B)** transduced with three different dox-shRNAs targeting *MS4A3* after ± 0.1 µg/mL dox treatment for 72 h. shRNA #1659 resulted in the best KD and was selected for use in subsequent experiments. Error bars represent SEM. **(C-D)** Relative *MS4A3* mRNA levels of CML and CB samples after lentiviral transduction and culture in the indicated conditions for 72 h. **(E)** Effect of *MS4A3* KD on colony formation of normal adult BM CD34<sup>+</sup> cells.

**Figure S4. *MS4A3* expression is regulated by DNA methylation in CML and is correlated with granulocytic lineage genes in AML. (A)** *MS4A3* co-expression genes in TCGA AML cohort (NEJM, 2013)<sup>1</sup> analyzed by cBioPortal<sup>2</sup>. List shows the top positively correlated genes. Red font: *CEBPE* (*C/EBPε*) is the most significantly correlated transcription factor. Bold font: genes in the six-gene set identified in the combined meta-analysis. **(B-D)** Primary CML CD34<sup>+</sup> cells were treated with DNA methylation inhibitors as indicated, and *MS4A3* expression level was analyzed by qRT-PCR.

**Figure S5. *MS4A3* does not regulate cell cycle progression or pCDK2 level; nor does it decrease with active cell proliferation in CML cells. (A)** K562 cells, LAMA-84 cells, and primary CP-CML CD34<sup>+</sup> cells were lentivirally transduced for *MS4A3* overexpression or KD, and analyzed for DNA content indicating the cell cycle stages using propidium iodide staining and flow cytometry. No obvious change in cell cycle distribution is observed with alterations of

MS4A3. **(B)** Immunoblot and flow cytometry analyses demonstrate no correlation between MS4A3 protein levels and pCDK2 levels in CML cell lines. **(C)** MS4A3 expression levels were detected in cells with or without active proliferation in CD34<sup>+</sup> cell cultures, using qRT-PCR. Active proliferation (more divisions) is labelled by reduced CFSE fluorescent intensity. No suppression of MS4A3 is observed in proliferating cells.

**Figure S6. Confirmation of MS4A3 flow cytometry antibody specificity, and additional images for Fig.6H. (A)** Relative mRNA level of *MS4A3* after dox-induced shRNA KD in M07e cells. Flow cytometry detection of MS4A3 protein using the monoclonal antibody specific to MS4A3 and PE-conjugated secondary antibody. Antibody labelling reduces as *MS4A3* mRNA decreases with incremental times of dox induction. **(B)** MS4A3 monoclonal antibody recognizes cell-free MS4A3-EGFP protein. MS4A3-EGFP fusion proteins were ectopically expressed in HEK293T cells, and then pulled down with agarose bead-bound polyclonal GFP antibody. MS4A3-EGFP-bound beads were then labelled by MS4A3 monoclonal antibody, GFP monoclonal antibody (positive control, different species from pulldown antibody), and CD3 monoclonal antibody (negative control), followed by corresponding fluorescent secondary antibodies. MS4A3 monoclonal antibody signal was comparable to the positive control. **(C)** LAMA-84 cells with or without GM-CSF stimulation (5 min) were fixed, stained for MS4A3 and CD116, and imaged by confocal microscopy. Arrows depict clusters of MS4A3 and CD116.

**Figure S7. MS4A3 knockdown does not inhibit endocytosis of the  $\beta$ c independent receptor – Kit (CD117) and G-CSFR (CD114). (A)** Representative flow cytometry plots showing the rapid endocytosis of CD117 after SCF stimulation in LAMA-84 cells. **(B)** Quantification of SCF induced CD117 endocytosis in LAMA-84 cells lentivirally transduced with dox-sh*MS4A3*, with or without dox mediated shRNA induction. **(C-D)** CP-CML CD34<sup>+</sup> cells were revived and lentivirally transduced for *MS4A3* KD or overexpression, then used for CD114 endocytosis assay. Cells were stimulated with 10 ng/mL G-CSF or PBS control for 5 minutes at 37°C, and surface CD114 were analyzed by flow cytometry. **(E)** Baseline CD114 surface expression on cells used in panel C-D. **(F)** CP-CML CD34<sup>+</sup> cells were revived and lentivirally transduced with empty GFP vector. GM-CSF-induced CD116 endocytosis was analyzed by flow cytometry. **(G-H)** GM-CSF/IL-3-induced intracellular kinase activation in cells used in panel F.

**Figure S8. CD116 (*CSF2RA* / GM-CSFR $\alpha$ ), and CD123 (*IL3RA* / IL-3R $\alpha$ ) expression in myeloid hematopoiesis. (A)** CD116 and CD123 levels in various cells as shown by BloodSpot

illustration of the Dataset GSE42519. **(B)** Flow cytometry analysis of cell surface CD116 and CD123 expression in CML patient samples (N = 3).

**Figure S9. Evolutionary phylogenetic trees of MS4A3-coding and M-CSF-coding gene orthologs.** Gene orthologs were discovered in NCBI Gene database. One protein of each species was included in alignment and clustering using the Constraint-based Multiple Alignment Tool <sup>3</sup>.

## **METHODS**

### ***Cell lines and patient samples.***

All CML cell lines were maintained in RPMI1640 supplemented with 10% fetal bovine serum (FBS), 100 U/mL penicillin-streptomycin, and 2 mM L-glutamine (GIBCO, Thermo Fisher Scientific, Waltham, MA, USA). Mononuclear cells (MNCs) from normal cord blood (CB) or femoral head donors, or peripheral blood (PB) of CML patients were separated by density centrifugation on Ficoll-Hypaque (GE Healthcare, Waukesha, WI, USA). CD34<sup>+</sup> cells were selected using an autoMACS system (Miltenyi Biotec, Bergisch Gladbach, Germany), confirmed for >90% purity on a Guava easyCyte HT Flow Cytometer (Millipore, Billerica, MA), and cryopreserved. Additional normal adult BM CD34<sup>+</sup> cells collected from adult donors under 60 years old were purchased from AllCells (Alameda, CA, USA). Fresh or frozen CD34<sup>+</sup> cells were cultured in IMDM supplemented with 10% BIT9500 (StemCell Technologies, Vancouver, BC), 100 U/mL penicillin-streptomycin, 2 mM L-glutamine, and StemSpan cytokines (CC100; StemCell Technologies) for 24-48 h at 37°C prior to use in biological assays. All cell lines used were authenticated by Short tandem repeat (STR) fingerprinting. CML cell lines were confirmed to harbor exclusively native *BCR-ABL1* by conventional Sanger sequencing in both directions using BigDye terminator chemistry on an ABI3730 instrument<sup>71</sup>. A complete list of patient samples used in this study can be found in Supplementary Table S1. All patients gave informed consent in accordance with the Declaration of Helsinki, and all studies with human specimens were approved by the University of Utah Institutional Review Board (IRB).

### ***Scl-tTA<sup>+</sup>;TRE-BCR-ABL1<sup>+</sup> compound transgenic mice.***

*Scl-tTA<sup>+</sup>;TRE-BCR-ABL1<sup>+</sup>* double transgenic mice were kindly provided by Emmanuelle Passegué <sup>4</sup>. These mice express tetracycline transactivator (tTA) in BM HSCs and CMPs, as well

as BCR-ABL1 under control of a tetracycline response element (TRE), such that BCR-ABL1 expression is repressed in the presence of doxycycline (tetracycline analog, 2 g/L, 5% sucrose, Gold Biotechnology, St. Louis, MO, USA) and expressed upon dox withdrawal. BM cells from double transgenic mice were used for *ex vivo* culture experiments. Lin<sup>-</sup> BM cells were isolated from *Sci-tTA<sup>+</sup>;TRE-BCR-ABL1<sup>+</sup>* mice maintained in the continuous presence of dox (0.1 µg/mL, Gold Biotechnology Inc.), and cultured for 72-96 hours without dox to turn on BCR-ABL1 expression. Resulting cells were assessed for *Ms4a3* mRNA expression by qRT-PCR. A list of primer sequences is available in Supplementary Table S2. Lin<sup>-</sup> BM cells were also used for *ex vivo* shRNA-mediated *Ms4a3* KD experiments with scrambled RNA transfected cells as controls (GE Healthcare Dharmacon, Inc., Chicago, IL, USA). These mouse *Ms4a3* shRNA vectors are not dox-inducible. Lentivirus transduced (GFP<sup>+</sup>) Lin<sup>-</sup> BM cells were plated in semisolid culture (72 h) or colony formation assays ± doxycycline (0.1 µg/ml). For BM transplant, BM cells were flushed out from donor mice. RBC were lysed, and Lin<sup>-</sup> BM hematopoietic cells were quantified by flow cytometry. Equal number (6x10<sup>5</sup>) of Lin<sup>-</sup> BM cells from *Ms4a3* knockout and control donors were i.v. injected into lethally irradiated *Ms4a3<sup>+</sup>* recipient mice. All animal experiments in this manuscript were approved by the University of Utah Institutional Animal Care and Use Committee (IACUC).

### ***Xenograft in NSG mice.***

CD34<sup>+</sup> cells from CP-CML (n=3) patients were lentivirally transduced with dox-inducible shRNA targeting human *MS4A3* (sh*MS4A3*) in tandem with GFP, and the resulting unsorted populations were injected into sub-lethally irradiated 8-week-old NSG recipients (NOD.Cg-*Prkdc<sup>scid</sup> Il2rg<sup>tm1Wjl</sup>/SzJ*, #005557, Jackson Laboratory, Bar Harbor, ME, USA; 6 mice/sample, 1.2x10<sup>6</sup> cells/mouse) 72 hours post-infection. Following two weeks of engraftment, half of the mice remained on regular water, and half of the mice were placed on dox-containing water (2 g/L and changed twice a week, with 5% sucrose, Gold Biotechnology) to induce knockdown. All recipient mice received sulfadimethoxine (0.125 mg/mL, Vet One, Boise, ID, USA) in the drinking water for the duration of the study. At 12 weeks, all mice were sacrificed to assess for hCD45<sup>+</sup> GFP<sup>+</sup> cells in the PB, BM, and spleen.

### ***mRNA expression analysis by qRT-PCR.***

RNA extraction was performed using the RNeasy Mini Kit (Qiagen, Germantown, MD) and converted to cDNA with the iScript cDNA Synthesis Kit (Bio-Rad Laboratories, Hercules, CA). cDNAs of indicated genes were detected by qRT-PCR using gene-specific primers

with SsoAdvanced™ SYBR® Green Supermix (Bio-Rad Laboratories) or by using primer/probes in a CFX96 Real-Time PCR Detection System (Bio-Rad Laboratories). Human genes expression was referenced to human beta-glucuronidase (*GUSB*) or *GAPDH*, and mouse genes to *Gapdh* and analyzed in CFX Manager (Bio-Rad Laboratories) using the “ $\Delta\Delta C_t$  method”. qRT-PCR analysis was done in triplicate for each experiment. All primers used with SYBR® Green Supermix were designed to have consistent amplification efficiency across genes in the same PCR program. A list of primers used can be found in Supplementary Table S2 and additional reagents and resources may be found in the Key Resources Table.

### **Western blotting analysis.**

For LAMA-84 cell line, cells were treated as indicated in the experiments and then immediately chilled on ice-water mixture to stop enzymatic activities before being lysed in RIPA buffer. Protein lysates were denatured at 95 °C for 10 min prior to being electrophoresis on SDS-PAGE gels and being transferred to nitrocellulose membranes. Membranes were blocked in 5% non-fat milk in TBST buffer, and probed with primary antibody, followed by species matched secondary antibody-HRP conjugates. Blots were imaged with Pierce™ enhanced chemiluminescence substrate (Thermo Fisher Scientific, Waltham, MA) on ChemiDoc XRS+ imaging system (Bio-Rad Laboratories, Hercules, CA). A list of antibodies used can be found in Supplementary Table S3 and additional reagents and resources may be found in the Key Resources Table.

### **Plasmids.**

Inducible shRNAs targeting *MS4A3* (sh*MS4A3*) were purchased from Collecta (Mountain View, CA, USA). Briefly, sh*MS4A3* was inserted into a tetracycline-inducible vector (pRSIT12-U6Tet-CMV-TetR-2A-TagGFP-2A-Puro), containing the wild-type tetracycline repressor (tetR); thus, transcription is blocked unless 0.1 µg/mL doxycycline is present in the culture medium. Construct #1659 resulted in the most efficient KD of *MS4A3* in CP-CML CD34<sup>+</sup> cells, and was chosen for further studies (Suppl. Fig. 3). For ectopic expression, human *MS4A3* was PCR amplified from mononuclear cells of a healthy donor, *CEBPE* from KBM5 cells, *MECOM* (transcript RefSeq NM\_005241) from HEL cells, and subcloned into the XbaI- and NotI-digested pCDH-CMV-MCS-EF1-copGFP vector (System Biosciences, Mountain View, CA, USA). Gene inserts were Sanger sequenced (by Univ. of Utah Genomics Core) to verify authenticity.

### **Lentivirus.**

Lentivirus-producing 293FT (#R70007, Thermo Fisher Scientific) cells were maintained in culture in DMEM plus 10% FBS, 2.0 mM L-glutamine, 100 U/mL penicillin-streptomycin, 1.0 mM sodium pyruvate, and 0.1 mM non-essential amino acids (GIBCO). Lentiviral constructs were packaged in combination with vesicular stomatitis virus glycoprotein (VSV-G) (Clontech, Mountain View, CA, USA) and psPax2 (for lentivirus production) using the ProFection® Mammalian Transfection System as recommended by the manufacturer (Promega, Madison, WI, USA). Lentivirus-containing supernatants were concentrated 100X using polyethylene glycol 8000 (Fisher Scientific, Lenexa, KS, USA). Derivative cells were generated by spinoculation of viral particles into cell lines, mouse BM, or primary CD34<sup>+</sup> samples, followed by FACS sorting of green fluorescent protein-positive (GFP<sup>+</sup>) cells when indicated. Expression of *MS4A3*, *CEBPE*, *MECOM*, and shRNA-mediated KD were validated by qRT-PCR analysis 48-72 h following sorting or drug selection.

### **Colony formation assays.**

Methylcellulose colony formation assays were performed by seeding CML cell lines or CD34<sup>+</sup> primary cells in 0.9% MethoCult (H4230; StemCell Technologies). 10<sup>3</sup> viable cells were plated in humid chambers at 37°C with 5% CO<sub>2</sub>, and primary cells were cultured in the presence of CC100 cytokine cocktail (StemCell Technologies). Where indicated, cells were also incubated with or without 0.1 µg/mL dox and/or imatinib at the indicated concentrations in duplicates. Colony forming unit granulocyte-macrophage colonies (CFU-GM) were scored under an inverted microscope following two weeks in culture.

### **LTC-IC assays.**

CD34<sup>+</sup> cells from CP-CML (n=3) patients were lentivirally transduced with shRNA targeting *MS4A3* (sh*MS4A3*), and resulting GFP<sup>+</sup> cells were sorted by FACS. Following 96 h culture ± imatinib and/or doxycycline (0.1 µg/ml), remaining CD34<sup>+</sup> cells were plated in MyeloCult (H5100; StemCell Technologies) on top of irradiated (80 Gy) M210B4 cells in LTC-IC assays as described<sup>5-7</sup>. After 6 weeks of culture with weekly half-medium changes, cells were trypsinized, plated into methylcellulose colony assays (H4435, StemCell Technologies), and scored after 21 days. BCR-ABL1<sup>+</sup> colonies were identified by FISH on individually plucked colonies as previously described<sup>8</sup>. Briefly, individual colonies were picked and resuspended in 100 µL PBS prior to cytopsin and fixation, and cells were immersed in 10% pepsin for 6 minutes at 37°C prior to hybridization. To detect *BCR-ABL1*, the Vysis LSI BCR/ABL Dual Color Dual Fusion Translocation Probe (Abbott Laboratories, Abbott Park, Illinois, USA) was used according to the

manufacturer's instructions. Fluorescent signals were visualized using an Axioskop 2 mot *plus* equipped with an AxioCam microscope camera (Carl Zeiss Microscopy, LLC, Thornwood, NY, USA).

#### ***Digital PCR for BCR-ABL1 genotyping.***

To detect low levels of *BCR-ABL1* transcripts in the BM, PB, and spleen of xenograft recipient mice, nanofluidic digital polymerase chain reaction was used <sup>9</sup>. Briefly, RNA was reverse transcribed followed by a pre-amplification step of 14 cycles. This is partitioned into three separate 765-well sections, followed by qRT-PCR using published primer pairs <sup>9</sup>. Copy number was calculated based on Poisson distribution.

#### ***DNA bisulfite conversion and patch PCR sequencing.***

DNA bisulfite and patch PCR sequencing was performed on DNA from CD34<sup>+</sup> cells from normal donor CB or from CP-CML, or BP-CML patients (n=3 for each sample type), as described <sup>10</sup>. Briefly, the human *MS4A3* promoter CpG islands were analyzed between the transcription start site (TSS) and 2000 bp upstream of the TSS. These sequences were scanned for *AluI* restriction fragments, and patch oligonucleotides were designed by sequentially including base pairs from the *AluI* restriction sites into fragment sequences until the T<sub>m</sub> of the patch oligo was between 62-67°C. Fragments whose patch oligos contained repetitive elements according to the RepeatMasker track were excluded. Patch oligos were then appended with the complement universal primer sequences, and resulting patch oligonucleotides were synthesized by SigmaGenosys. 149 pairs of patch oligos were ordered in a 96-well plate. Oligonucleotide sequences are listed in Supplementary Table S4. Additional sequences that were omitted due to amplification of repetitive elements are highlighted in grey. DNA bisulfite conversion (Zymo Research, Irvine, CA) was performed by the Molecular Diagnostics Section of the Biorepository and Molecular Pathology Shared Resource at Huntsman Cancer Institute (The University of Utah, Salt Lake City, UT). Resulting DNA sequences were analyzed on a HiSeq 50 Cycle Single-Read Sequencing v4 platform at the High-Throughput Genomics Shared Resource at Huntsman Cancer Institute (The University of Utah, Salt Lake City, UT).

#### ***32D-cl3 cells expressing BCR-ABL1.***

32D-cl3 cells were cultured in complete RPMI1640 supplemented with 10% WEHI culture supernatant as a source of murine IL-3. To generate stable cells, parental 32D-cl3 cells were infected with retrovirus produced by standard procedures using either pMIG-BCR-ABL1-p210-



WT-IRES-EGFP, pMIG-BCR-ABL1-p210-K271R-IRES-EGFP, or the empty vector pMIG-MCS-IRES-EGFP. After infection, the cells expressing p210<sup>BCR-ABL1</sup>, the kinase-inactive mutant (p210<sup>BCR-ABL1-K271R</sup>) or the empty vector were sorted for EGFP using a BD FACSAria™ II flow cytometer (BD Biosciences, Franklin Lakes, NJ). Cells were only used with a few passages to avoid phenotypic drifting. To assess the effect of BCR-ABL1 on *Ms4a3* transcript levels, 1×10<sup>6</sup> cells/well were plated in a 12-well plate and incubated with and without imatinib (2 μM) for indicated time. Cells were pelleted and qRT-PCR was performed as described above.

### ***ChIP-seq.***

CP-CML and BP-CML samples (CD34<sup>+</sup>, n=3 each, 1.2×10<sup>6</sup> cells each), as well as CB samples (CD34<sup>+</sup>, n=3, 0.9-1.5×10<sup>6</sup> each) were thawed and immediately resuspended in 1% formaldehyde (diluted in PBS from a 37% stock, with 10-15% methanol, F8775-500ML, Sigma-Aldrich, St. Louis, MO) and incubated at room temperature for 10 minutes without shaking. Glycine was added to 125 mM to quench formaldehyde and cells were centrifuged at 2,400g for 5 minutes. The cell pellet was washed in 1 mL of cold PBS and centrifuged again. The supernatant was discarded and the cells were stored at -80°C until further processing. Chromatin immunoprecipitation was performed as previously described <sup>11</sup>. Cells were sonicated for 8 cycles of 30 seconds with 30 seconds of rest on an Epishear probe-in sonicator (Active Motif). An antibody against H3K27me3 (Active Motif, cat # 39155) was used for pulldown and input DNA was used as controls for each sample. Libraries were sequenced on a HiSeq 2500 as single-end 50 base pair reads. Sequence reads were aligned using Bowtie <sup>12</sup>. Peaks were called using MACS2 <sup>13</sup> and samples were excluded when less than 10,000 peaks were called. MACS2 was used to create read depth normalized bedgraphs to visualize the *MS4A3* locus on IGV <sup>14</sup>.

### ***Epigenetic drug library screening.***

Primary CD34<sup>+</sup> cells from a CP-CML patient were used to screen an Epigenetics Screening Library (#11076, Cayman Chemicals, Ann Arbor, MI, USA). All cells were incubated in the presence of 1 μM compound or DMSO control for 72 h, followed by assessment of *MS4A3* mRNA by qRT-PCR using the *Power SYBR Green RNA-to-C<sub>1</sub>*™ *1-Step* Kit (Thermo Fisher Scientific) according to the manufacturer's instructions. Resulting hits were confirmed with additional CML patient samples as indicated.

### ***FACS and flow cytometry analysis.***

Sorting of CD34<sup>+</sup>38<sup>-</sup> stem cells from magnetically enriched CD34<sup>+</sup> cells was performed using FITC-anti-CD34 (#11-0341-81, eBioscience, San Diego, CA) and APC-anti-CD38 (#102712, BioLegend, San Diego, CA) antibodies. Antibody stained and GFP<sup>+</sup> cells were sorted by a FACS Aria™ II flow cytometer. For cell cycle analysis following culture in the indicated conditions, cells were fixed in 70% ethanol, stained with propidium iodide (PI), and analyzed for DNA content. For multi-colored flow cytometry, cells were blocked with Human TruStain FcX Fc Receptor Blocking Solution (BioLegend) and then stained with manufacturer recommended concentrations of antibodies in PBS containing 0.5% BSA on ice for 30 minutes. After washing, cells were analyzed on BD FACSCanto, with corresponding single fluorophore instructed compensations. For FRET signal detection in EGFP-RFP double positive cells, cells were excited at 488 nm laser and detected by the 695/40 nm filter (RFP emission) on BD Fortessa. Data were analyzed using FlowJo V10 data analysis software (FlowJo).

### ***Immunofluorescent (IF) staining and confocal microscopy***

For HEK293, cells were cultured on poly-Lysine coated cover glass and IF staining was performed directly on the cover glass. For LAMA-84, IF staining was carried out in suspension and stained cells were pressed onto glass slides by Cytospin (1000 rpm for 2 minutes). For surface protein IF staining, cells were fixed with 2% paraformaldehyde in PBS on ice for 15 minutes. After washing with 0.5% BSA in PBS, cells were blocked with 0.5% normal serum of the secondary antibody matched species in PBS for 30 minutes. Primary antibodies and species-matching fluorescently labelled secondary antibodies were incubated with cells in 0.5% BSA in PBS for 1 hour each, with 3 washed in between. Then cell nucleus was stained with Hoechst 33342 (BD) for 5 minutes. For intracellular protein staining and total cell protein staining, cells were fixed with 2% paraformaldehyde in PBS on ice for 15 minutes. After washing with 0.5% BSA in PBS, cells were permeabilized with 0.2% saponin in PBS for 30 minutes, and washed with perm/wash buffer (0.5% BSA and 0.05% saponin in PBS). Primary antibodies and species-matching fluorescently labelled secondary antibodies were incubated with cells in perm/wash buffer for 1 hour each, with 3 washed in between. Then cell nucleus was stained with DAPI (Biolegend) for 5 minutes. All IF staining procedures were performed on ice. Stained cells on slides were mounted with VECTASHIELD® Antifade Mounting Medium (Vector Laboratories), and imaged with a Leica SP8 405-488-561-633 laser confocal microscopy system (Cell Imaging Core, University of Utah). Images are processed and analyzed using LAS X software (Leica). Pearson's coefficient values between EGFP signal and Alexa Fluor 647 conjugated secondary antibodies were calculated with MS4A3-EGFP positive cells in each field of imaging (N=20). Relative fluorescent intensity (/ Max)

of each marker was calculated by marker protein fluorescent intensity divided by the maximal intensity of each cell.

### ***Cytokine receptor endocytosis analysis.***

To assess the regulation of cytokine receptor endocytosis by MS4A3, we utilized the Ph<sup>+</sup> CML cell line, LAMA-84, or primary CD34<sup>+</sup> cells from CP-CML patients. Cells were transduced with indicated lentiviruses to overexpress or knockdown MS4A3. 48 hours later, LAMA-84 cells were selected by Puromycin (1 µg/mL) to obtain pure populations of transduced cells. After viral transduction, CML cells were cultured with or without dox (0.1 µg/mL) to induce knockdown in dox-shMS4A3 group for 72 hours. GFP<sup>+</sup> cells are positively transduced cells, while GFP<sup>-</sup> cells serve as un-transduced internal control. To stimulate receptor endocytosis, GM-CSF (10 ng/mL) or IL-3 (40 ng/mL) were added to the cells, and cells were incubated at 37 °C for 5 – 15 minutes. After the stimulation, cells were immediately chilled on ice-water mixture to stop cellular activities, and all operations were performed at 4 °C or on ice from then on. Cells with or without cytokine stimulation were washed with ice-cold PBS (+ 0.5% BSA), and stained with CD116-APC antibody (clone REA211, Miltenyi Biotec) or CD123-BV711 antibody (clone 9F5, BD) on ice. After washing, the surface labelled receptor was analyzed by flow cytometry.

### ***Nanoparticles.***

The prototype liposomal nanoparticles used in this study were manufactured from LAMA-84 cells that naturally express CD62L and readily shed granular lipid particles from plasma membrane (unpublished data). For Nano-CD62L/MS4A3, particles were collected from the culture supernatant of LAMA-84 cells overexpressing MS4A3-EGFP. For Nano-CD62L (MS4A3-free), particles were collected from the culture supernatant of LAMA-84 cells after CRISPR-mediated MS4A3 knockout. All nanoparticles were pelleted from the supernatant by adding 10% PEG-8000 and 0.3M NaCl, resuspended in RPMI1640 to achieve 100X concentration, and then stored at -80°C in aliquots. Nanoparticles were added to CD34<sup>+</sup> cell cultures at 50 µL/mL. To facilitate initial nanoparticle uptake, 10 µg/mL polybrene was added to the cultures for 12h, and then diluted or washed off. Mock treatment is the addition of polybrene only. The standard curve coordinating FSC (flow cytometry) and particle size was generated using commercial reference microbeads of known sizes (BD). To titrate the dosage of nanoparticles for delivery into CD34<sup>+</sup> cells, Kasumi-1 (CD34<sup>+</sup> myeloblast, doubling time ~48h) cells were used as target cells.

## QUANTIFICATION AND STATISTICAL ANALYSIS

**Meta-analysis.** Series matrix files for the McWeeney dataset (GSE14671), comparing TKI responders versus non-responders<sup>15</sup>, and the Cramer-Morales dataset (GSE47927), comparing LSCs versus progenitor cells<sup>16</sup> were downloaded from the Gene Expression Omnibus (<https://www.ncbi.nlm.nih.gov/geo/>). The Zheng dataset (E-MEXP-480) comparing CP-CML versus BP-CML<sup>17</sup>, Yong dataset (E-MIMR-17) comparing long versus short duration of CP-CML<sup>18</sup>, and Graham dataset (E-MTAB-2508) comparing cycling versus quiescent CML cells<sup>19</sup> were downloaded from ArrayExpress (<http://www.ebi.ac.uk/arrayexpress>). Probe IDs were converted to gene symbols, and genes in each study having an absolute magnitude fold change  $\geq 1.5$  (for upregulated genes) and  $\leq -1.5$  (for downregulated genes) were considered for overlapping gene detection if statistical significance (using non-parametric methods) at  $p < 0.05$  was observed. The genes identified as commonly up- or down-regulated compared with the McWeeney dataset were tallied and the statistical likelihood for the number of common genes observed compared to that expected by chance was determined using an exact Binomial test as previously described<sup>20</sup>.

**Kaplan-Meier Survival Curve.** Correlation of *MS4A3* mRNA levels with survival in CML was established using survival data available for 35 patients from the original microarray training set<sup>15</sup>. All CEL files from the original study<sup>15</sup> were imported with Partek software (Partek, Inc.) followed by GC-RMA normalization (which included normalization of intensities to the median sample of the experiment). Expression levels were calculated from the microarray (HG-U133A, Affymetrix, Inc.) and dichotomized into high and low groups based on distribution of the data. OS was assessed with Kaplan-Meier curves generated in Prism version 6.04 (GraphPad Software, La Jolla, CA). All statistical analyses were performed in SAS version 9.3 (SAS Institute, Carey, NC), and P-values are 2-sided from a log-rank test.

***MS4A3* analysis by microarray.** The microarray data presented here are a combination of two separate experiments from Oehler V. et al. (unpublished data) and Zheng et al.<sup>17</sup>, which is available from ArrayExpress under accession number E-MEXP-480. In total, CML CD34<sup>+</sup> cells were analyzed for 8 CP-CML and 7 BP-CML samples by Oehler et al., and 11 CP-CML and 9 BP-CML samples by Zheng et al.<sup>17</sup>, yielding a total of 19 CP-CML and 16 BP-CML samples. Briefly, RNA was extracted using the RNeasy Mini Kit (Qiagen, Hilden, Germany). Preparation of hybridization probes and HG-U133A microarray processing were performed according to the manufacturer's instructions (Affymetrix, Santa Clara, CA).

**Statistical analysis.** Two-tailed *t* test (or with Welch's correction when SD is unequal) was used for experiments in Figure 1C, 1E, 2C-D, 2F-H, 3A-F, 4B-C, 4E-F, 7F-D, 8B-I. When comparing two groups, *t* test is replaced by Mann-Whitney non-parametric test if the sample values do not conform to a normal distribution. One-way ANOVA was used for experiments in Figure 1B, 7E. Fisher's exact test was used for the experiment in Figure 6E. For all assays, three independent experiments were performed unless otherwise noted.

## REFERENCES

- 1 Cancer Genome Atlas Research, N. *et al.* Genomic and epigenomic landscapes of adult de novo acute myeloid leukemia. *N Engl J Med* **368**, 2059-2074, doi:10.1056/NEJMoa1301689 (2013).
- 2 Cerami, E. *et al.* The cBio cancer genomics portal: an open platform for exploring multidimensional cancer genomics data. *Cancer Discov* **2**, 401-404, doi:10.1158/2159-8290.CD-12-0095 (2012).
- 3 Papadopoulos, J. S. & Agarwala, R. COBALT: constraint-based alignment tool for multiple protein sequences. *Bioinformatics* **23**, 1073-1079, doi:10.1093/bioinformatics/btm076 (2007).
- 4 Reynaud, D. *et al.* IL-6 controls leukemic multipotent progenitor cell fate and contributes to chronic myelogenous leukemia development. *Cancer Cell* **20**, 661-673, doi:10.1016/j.ccr.2011.10.012 (2011).
- 5 Hogge, D. E., Lansdorp, P. M., Reid, D., Gerhard, B. & Eaves, C. J. Enhanced detection, maintenance, and differentiation of primitive human hematopoietic cells in cultures containing murine fibroblasts engineered to produce human steel factor, interleukin-3, and granulocyte colony-stimulating factor. *Blood* **88**, 3765-3773 (1996).
- 6 Petzer, A. L., Hogge, D. E., Lansdorp, P. M., Reid, D. S. & Eaves, C. J. Self-renewal of primitive human hematopoietic cells (long-term-culture-initiating cells) in vitro and their expansion in defined medium. *Proc Natl Acad Sci U S A* **93**, 1470-1474 (1996).
- 7 Eiring, A. M. *et al.* Combined STAT3 and BCR-ABL1 inhibition induces synthetic lethality in therapy-resistant chronic myeloid leukemia. *Leukemia* **31**, 1253-1254, doi:10.1038/leu.2017.14 (2017).
- 8 Reinhold, U., Hennig, E., Leiblein, S., Niederwieser, D. & Deininger, M. W. FISH for BCR-ABL on interphases of peripheral blood neutrophils but not of unselected white cells correlates with bone marrow cytogenetics in CML patients treated with imatinib. *Leukemia* **17**, 1925-1929, doi:10.1038/sj.leu.2403077 (2003).
- 9 Goh, H. G. *et al.* Sensitive quantitation of minimal residual disease in chronic myeloid leukemia using nanofluidic digital polymerase chain reaction assay. *Leuk Lymphoma* **52**, 896-904, doi:10.3109/10428194.2011.555569 (2011).
- 10 Varley, K. E. & Mitra, R. D. Bisulfite Patch PCR enables multiplexed sequencing of promoter methylation across cancer samples. *Genome Res* **20**, 1279-1287, doi:10.1101/gr.101212.109 (2010).
- 11 Reddy, T. E. *et al.* Genomic determination of the glucocorticoid response reveals unexpected mechanisms of gene regulation. *Genome Res* **19**, 2163-2171, doi:10.1101/gr.097022.109 (2009).

- 12 Langmead, B., Trapnell, C., Pop, M. & Salzberg, S. L. Ultrafast and memory-efficient alignment of short DNA sequences to the human genome. *Genome Biol* **10**, R25, doi:10.1186/gb-2009-10-3-r25 (2009).
- 13 Zhang, Y. *et al.* Model-based analysis of ChIP-Seq (MACS). *Genome Biol* **9**, R137, doi:10.1186/gb-2008-9-9-r137 (2008).
- 14 Robinson, J. T. *et al.* Integrative genomics viewer. *Nat Biotechnol* **29**, 24-26, doi:10.1038/nbt.1754 (2011).
- 15 McWeeney, S. K. *et al.* A gene expression signature of CD34+ cells to predict major cytogenetic response in chronic-phase chronic myeloid leukemia patients treated with imatinib. *Blood* **115**, 315-325, doi:10.1182/blood-2009-03-210732 (2010).
- 16 Abraham, S. A. *et al.* Dual targeting of p53 and c-MYC selectively eliminates leukaemic stem cells. *Nature* **534**, 341-346, doi:10.1038/nature18288 (2016).
- 17 Zheng, C. *et al.* Gene expression profiling of CD34+ cells identifies a molecular signature of chronic myeloid leukemia blast crisis. *Leukemia* **20**, 1028-1034, doi:10.1038/sj.leu.2404227 (2006).
- 18 Yong, A. S., Szydlo, R. M., Goldman, J. M., Apperley, J. F. & Melo, J. V. Molecular profiling of CD34+ cells identifies low expression of CD7, along with high expression of proteinase 3 or elastase, as predictors of longer survival in patients with CML. *Blood* **107**, 205-212, doi:10.1182/blood-2005-05-2155 (2006).
- 19 Graham, S. M., Vass, J. K., Holyoake, T. L. & Graham, G. J. Transcriptional analysis of quiescent and proliferating CD34+ human hemopoietic cells from normal and chronic myeloid leukemia sources. *Stem Cells* **25**, 3111-3120, doi:10.1634/stemcells.2007-0250 (2007).
- 20 Armitage, P. *Statistical Methods in Medical Research 3ed.* (Blackwell, 1994).

# Graphic abstract

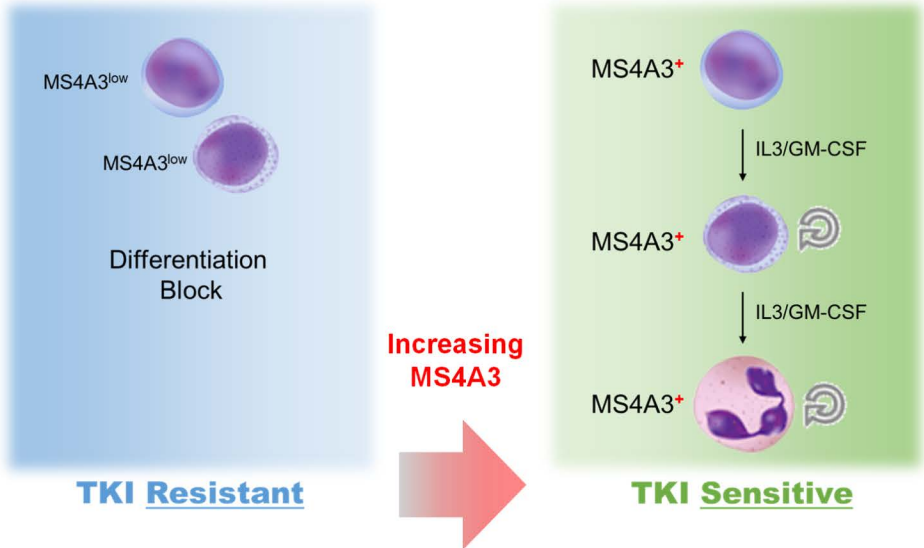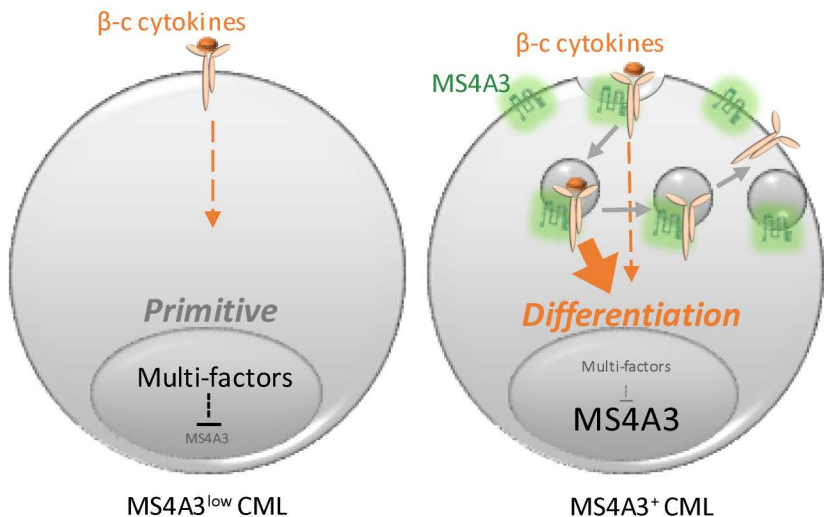

Multi-factors:

BCR-ABL1, MECOM, DNA methylation, EZH2/H3K27me3

Supplemental Figure 1

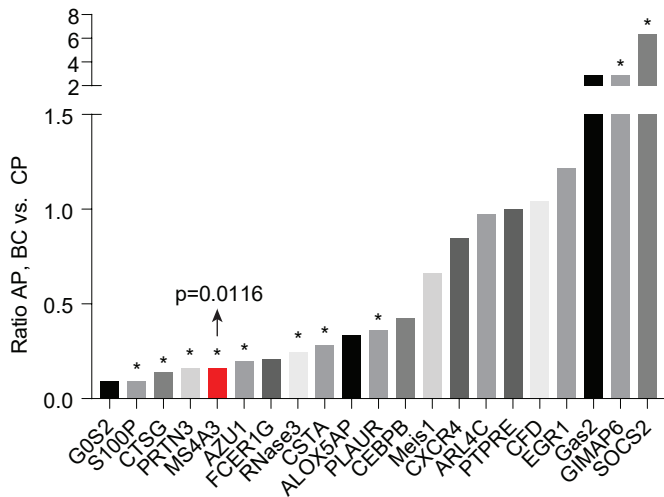



Supplemental Figure 2

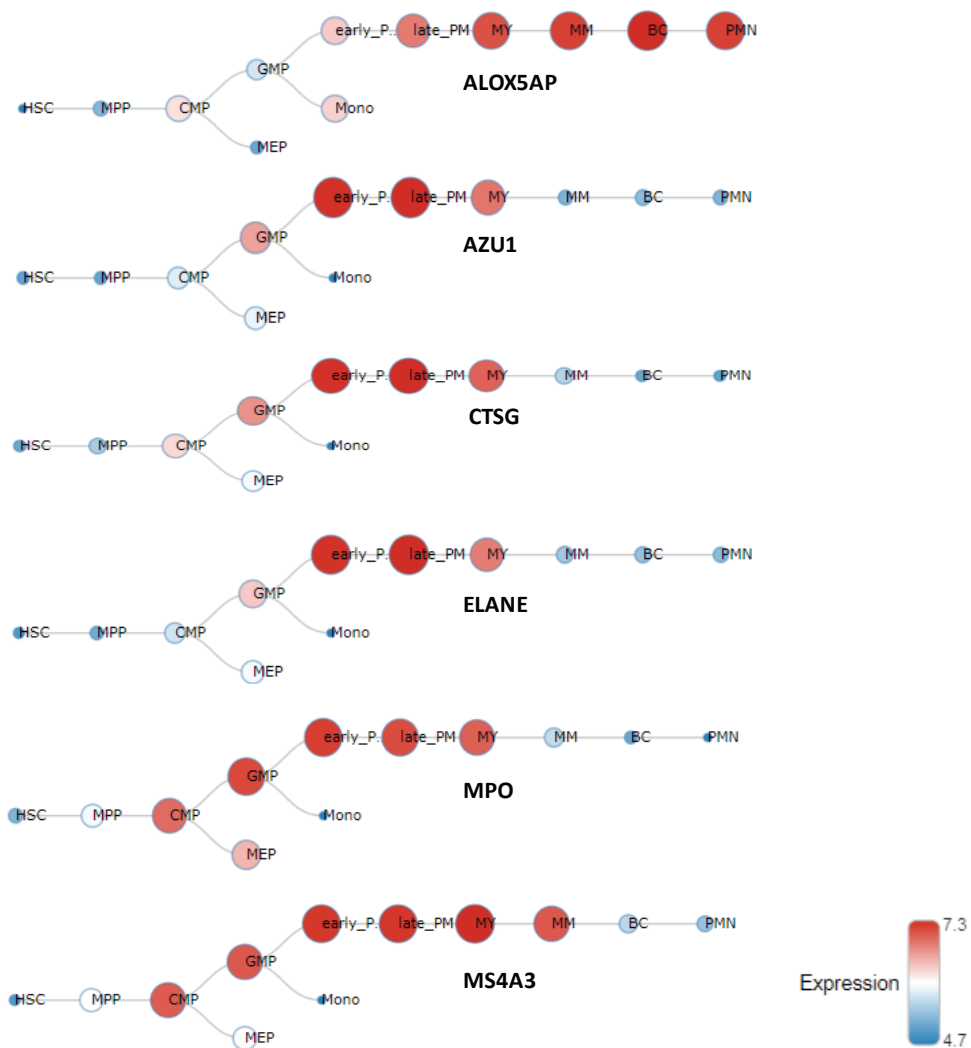

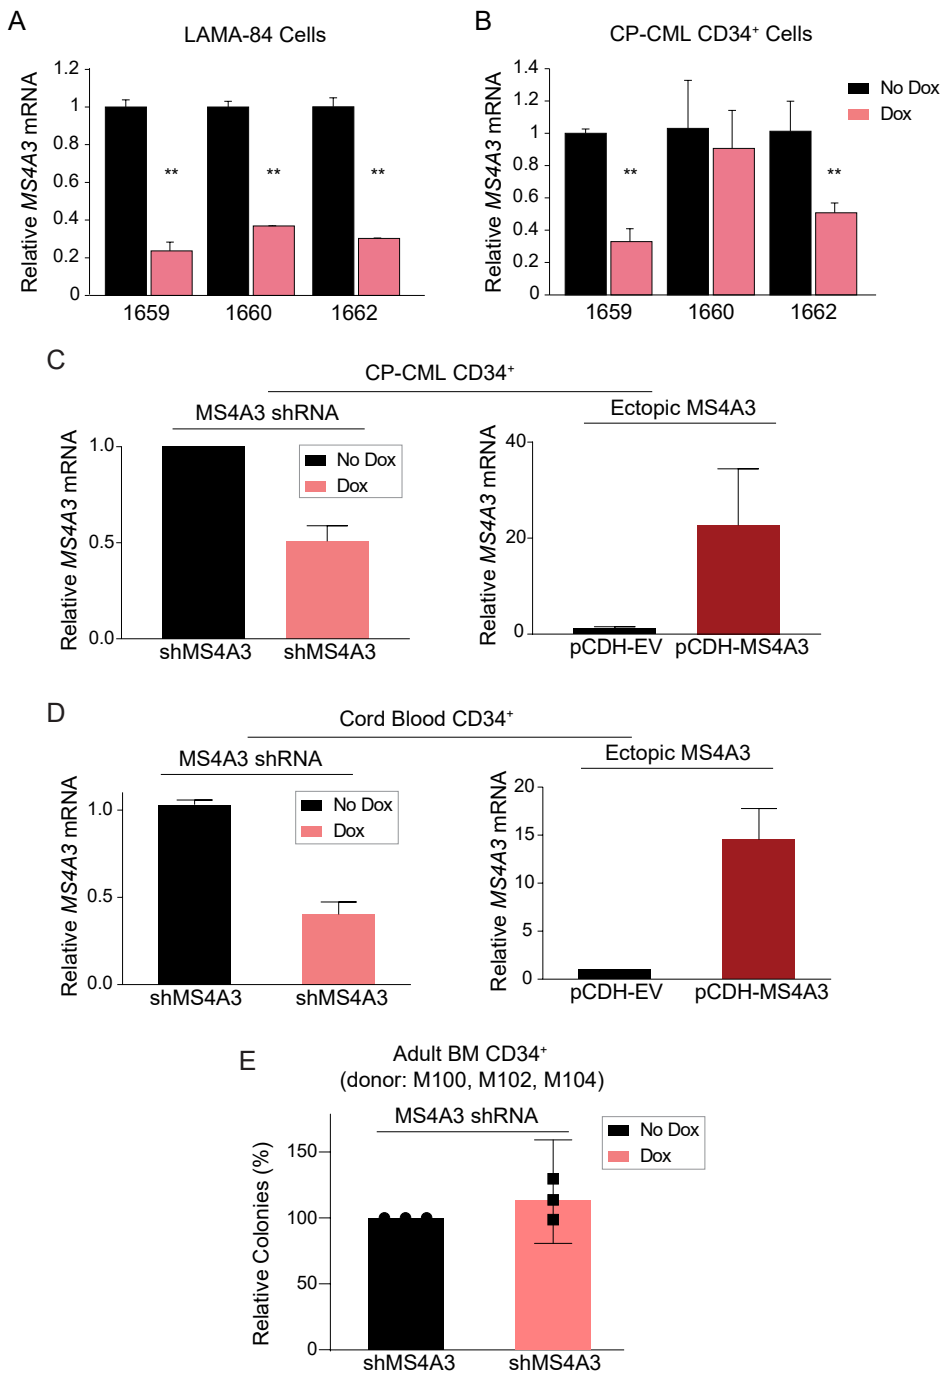

A

Co-expression with *MS4A3*

| Correlated Gene  | Spearman's Correlation | -LOG <sub>10</sub> (q-value) |
|------------------|------------------------|------------------------------|
| <i>AFF2</i>      | 0.695                  | 19.640                       |
| <i>CTSG</i>      | 0.687                  | 19.209                       |
| <i>CEBPE</i>     | 0.678                  | 18.606                       |
| <i>AZU1</i>      | 0.662                  | 17.384                       |
| <i>ELANE</i>     | 0.656                  | 16.991                       |
| <i>RNASE3</i>    | 0.622                  | 14.462                       |
| <i>NOCT</i>      | 0.620                  | 14.427                       |
| <i>P4HB</i>      | 0.620                  | 14.427                       |
| <i>CILP2</i>     | 0.613                  | 14.024                       |
| <i>HSP90B1</i>   | 0.610                  | 13.886                       |
| <i>HAL</i>       | 0.606                  | 13.650                       |
| <i>SERPINB10</i> | 0.597                  | 13.088                       |
| <i>LPO</i>       | 0.592                  | 12.780                       |
| <i>CALR</i>      | 0.591                  | 12.740                       |
| <i>P2RY2</i>     | 0.587                  | 12.553                       |
| <i>RAB32</i>     | 0.587                  | 12.551                       |
| <i>SRGN</i>      | 0.586                  | 12.551                       |
| <i>ERLIN1</i>    | 0.581                  | 12.221                       |
| <i>PLPPR3</i>    | 0.569                  | 11.511                       |
| <i>SLC39A11</i>  | 0.567                  | 11.455                       |
| <i>ATP23</i>     | 0.565                  | 11.362                       |
| <i>RNASE2</i>    | 0.563                  | 11.243                       |
| <i>S100P</i>     | 0.562                  | 11.194                       |
| <i>MPO</i>       | 0.556                  | 10.863                       |

B

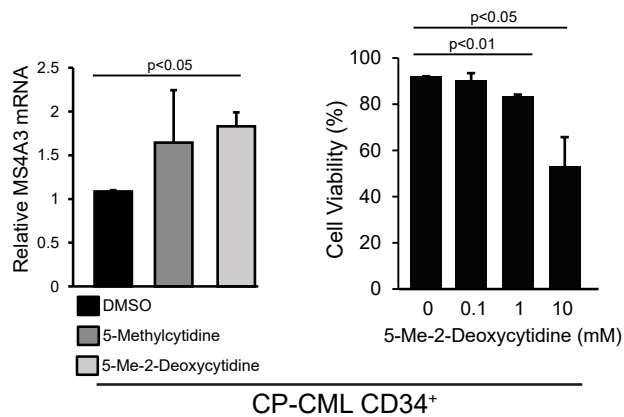

C

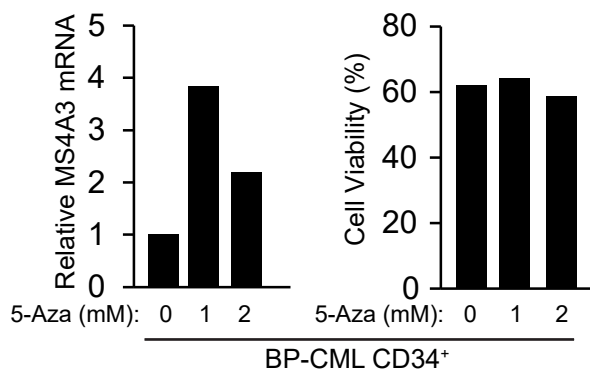

D

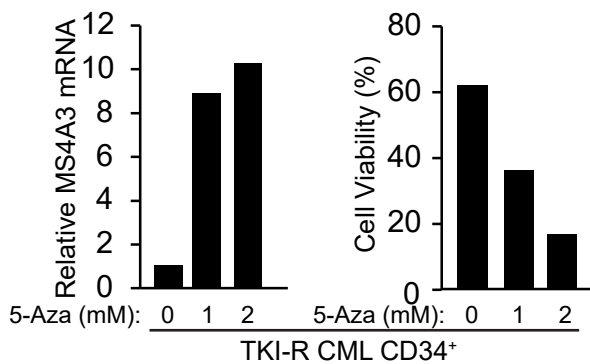

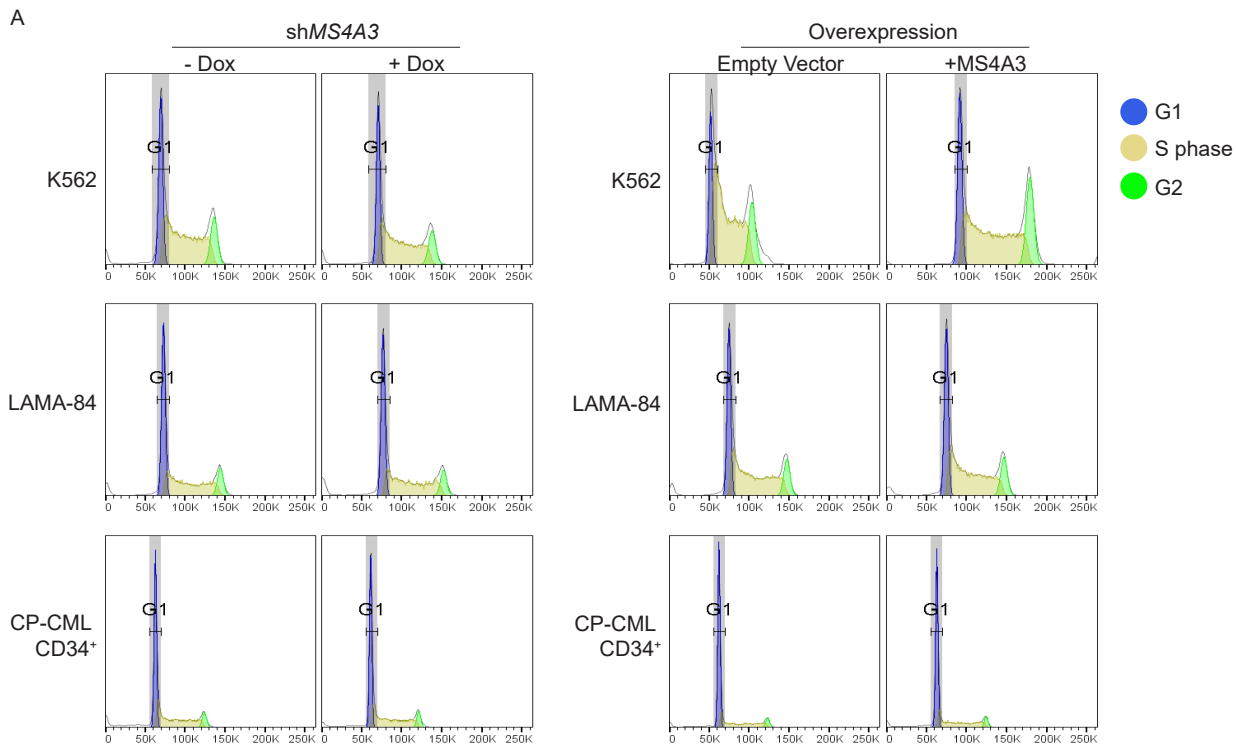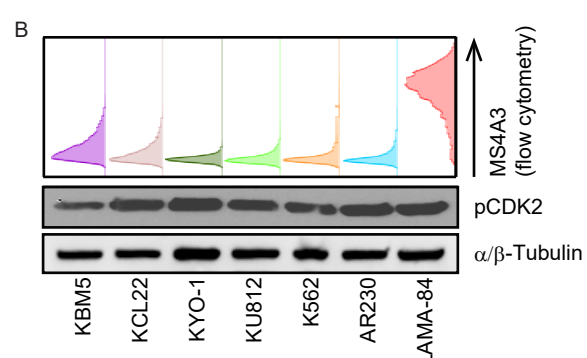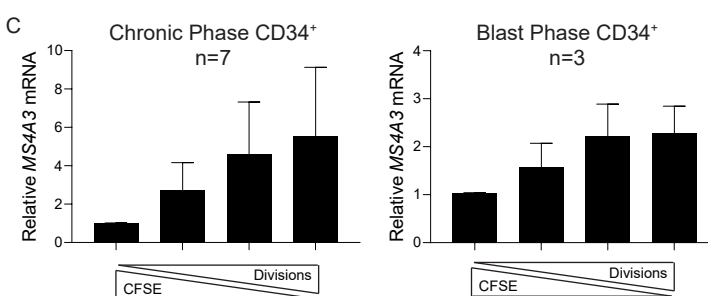

A

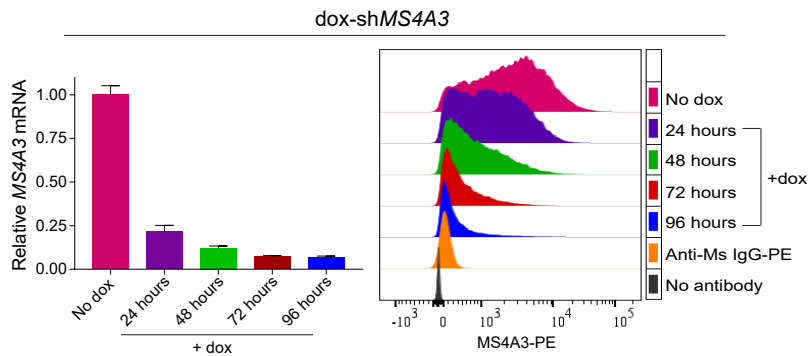

B

**MS4A3-EGFP pulldown  
+ on-bead Ab staining**

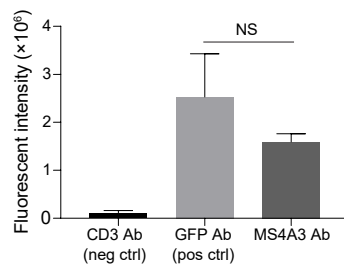

C

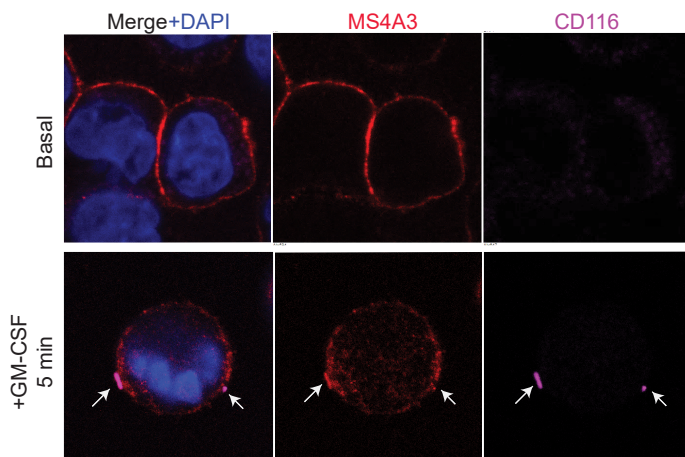

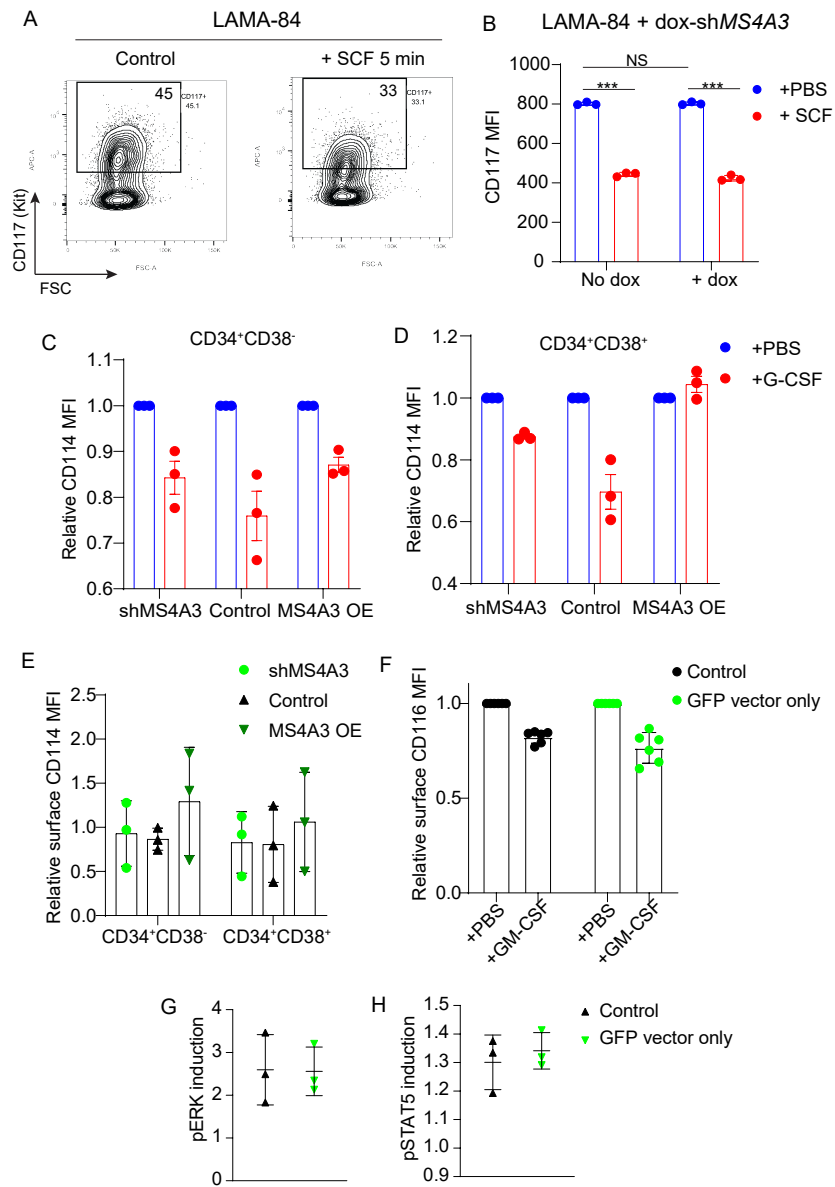

A

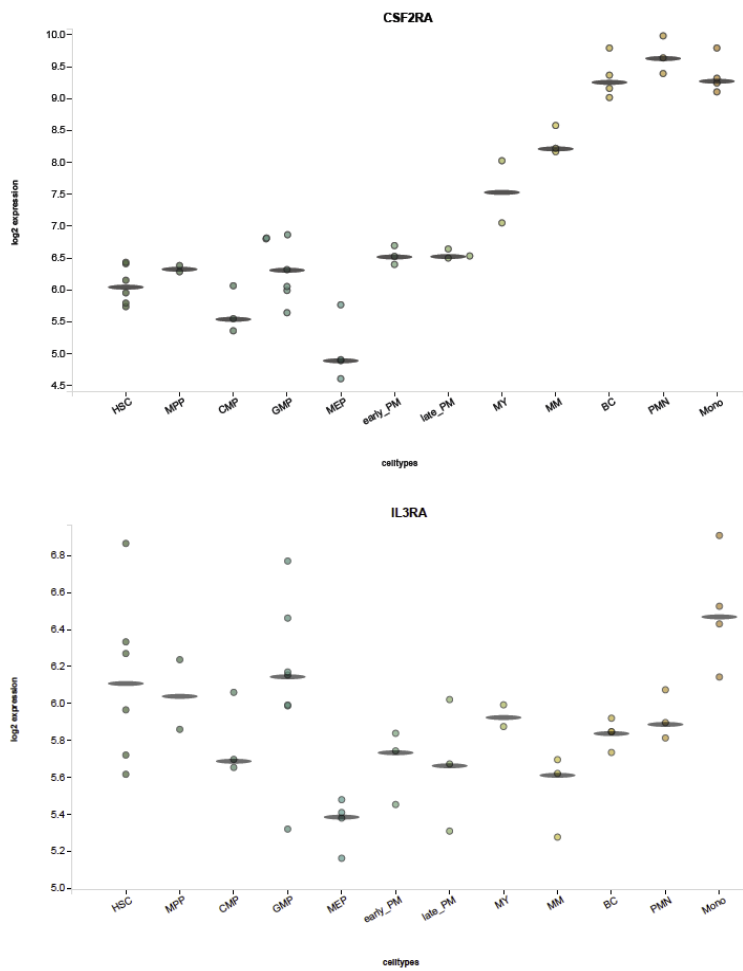

B

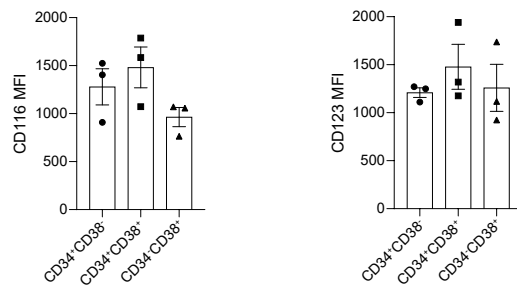

MS4A3 gene orthologs

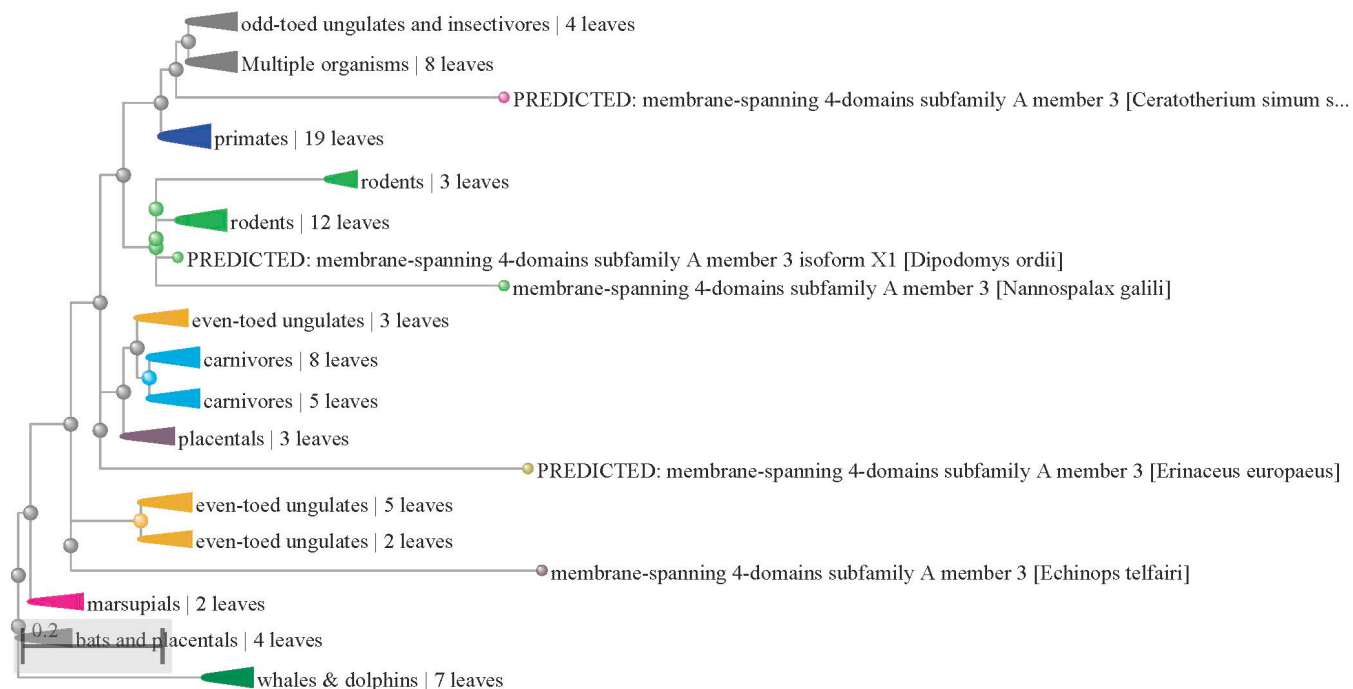

M-CSF gene orthologs

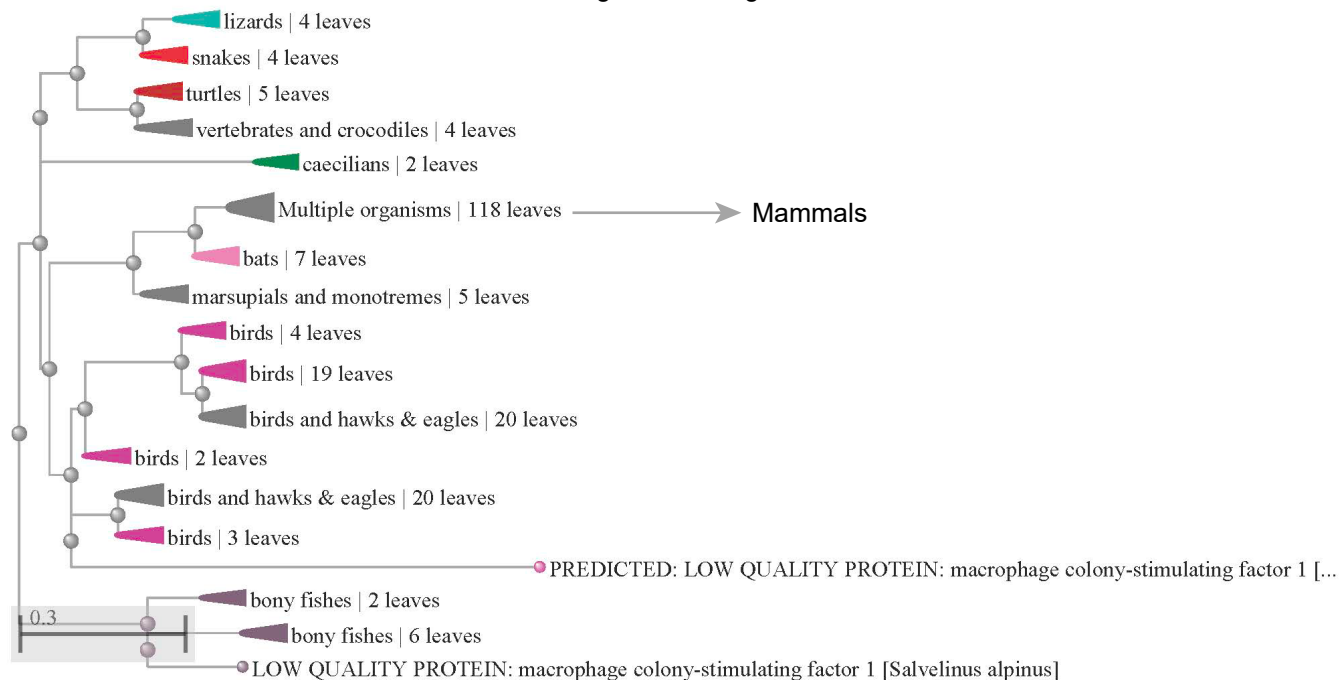



Supplementary Table S1. Patient sample summary

| Category               | Patient ID | CML Disease Phase | BCR-ABL1 Kinase Domain Mutations | Prior TKI Exposure | Type of Resistance | Assays                                                                                                                                                     |
|------------------------|------------|-------------------|----------------------------------|--------------------|--------------------|------------------------------------------------------------------------------------------------------------------------------------------------------------|
| <b>Newly Diagnosed</b> | M003       | CP-CML            | None                             | None               | N/A                | DNA bisulfite conversion & patch PCR sequencing                                                                                                            |
|                        | M009       | CP-CML            | None                             | None               | N/A                | qRT-PCR                                                                                                                                                    |
|                        | M010       | CP-CML            | None                             | None               | N/A                | qRT-PCR                                                                                                                                                    |
|                        | M011       | CP-CML            | None                             | None               | N/A                | qRT-PCR, shMS4A3, CFSE staining                                                                                                                            |
|                        | M014       | CP-CML            | None                             | None               | N/A                | qRT-PCR, shMS4A3, colony assays, immunoblot, LTC-IC, xenografts, CFSE staining, DNA bisulfite conversion & patch PCR sequencing                            |
|                        | M016       | CP-CML            | None                             | None               | N/A                | qRT-PCR, shMS4A3, colony assays, LTC-IC, xenografts                                                                                                        |
|                        | M017       | CP-CML            | None                             | None               | N/A                | qRT-PCR, shMS4A3, colony assays                                                                                                                            |
|                        | M018       | CP-CML            | None                             | None               | N/A                | qRT-PCR, shMS4A3, colony assays                                                                                                                            |
|                        | M021       | CP-CML            | None                             | None               | N/A                | Immunoblot, shMS4A3                                                                                                                                        |
|                        | M022       | CP-CML            | None                             | None               | N/A                | shMS4A3, colony assays                                                                                                                                     |
|                        | M023       | CP-CML            | None                             | None               | N/A                | qRT-PCR, CFSE staining                                                                                                                                     |
|                        | M024       | CP-CML            | None                             | None               | N/A                | qRT-PCR, shMS4A3, colony assays, DNA bisulfite conversion & patch PCR sequencing                                                                           |
|                        | M025       | CP-CML            | None                             | None               | N/A                | qRT-PCR, immunoblot, shMS4A3, annexin V, CFSE staining                                                                                                     |
|                        | M028       | CP-CML            | None                             | None               | N/A                | qRT-PCR, immunoblot, shMS4A3, colony assays, annexin V, LTC-IC, xenografts, CFSE staining, CD38 selection, DNA bisulfite conversion & patch PCR sequencing |
|                        | M029       | CP-CML            | None                             | None               | N/A                | Immunoblot                                                                                                                                                 |
|                        | M030       | CP-CML            | None                             | None               | N/A                | qRT-PCR                                                                                                                                                    |
|                        | M040       | CP-CML            | None                             | None               | N/A                | qRT-PCR, immunoblot, ectopic MS4A3, shMS4A3, annexin V, CD38 selection                                                                                     |
|                        | M041       | CP-CML            | None                             | None               | N/A                | qRT-PCR, immunoblot, shMS4A3                                                                                                                               |
|                        | M043       | CP-CML            | None                             | None               | N/A                | qRT-PCR, shMS4A3, CD38 selection                                                                                                                           |
|                        | M044       | CP-CML            | None                             | None               | N/A                | qRT-PCR, shMS4A3                                                                                                                                           |
|                        | M045       | CP-CML            | None                             | None               | N/A                | Immunoblot, CD38 selection, qRT-PCR, shMS4A3                                                                                                               |
|                        | M046       | CP-CML            | None                             | None               | N/A                | Immunoblot, CD38 selection, qRT-PCR                                                                                                                        |
|                        | M047       | CP-CML            | None                             | None               | N/A                | qRT-PCR, shMS4A3                                                                                                                                           |
|                        | M051       | CP-CML            | None                             | None               | N/A                | Immunoblot                                                                                                                                                 |
|                        | M052       | CP-CML            | None                             | None               | N/A                | Immunoblot                                                                                                                                                 |
|                        | M055       | CP-CML            | None                             | None               | N/A                | qRT-PCR, differential sorting                                                                                                                              |
|                        | M059       | CP-CML            | None                             | None               | N/A                | qRT-PCR, ectopic MS4A3, CD38 selection, CFSE staining                                                                                                      |
|                        | M060       | CP-CML            | None                             | None               | N/A                | qRT-PCR, differential sorting                                                                                                                              |
|                        | M066       | CP-CML            | None                             | None               | N/A                | qRT-PCR, CFSE staining                                                                                                                                     |
|                        | M071       | CP-CML            | None                             | None               | N/A                | qRT-PCR, DNA bisulfite conversion & patch PCR sequencing                                                                                                   |
|                        | M073       | CP-CML            | None                             | None               | N/A                | qRT-PCR, shMS4A3                                                                                                                                           |
|                        | M074       | CP-CML            | None                             | None               | N/A                | qRT-PCR, differential sorting                                                                                                                              |
|                        | M078       | CP-CML            | None                             | None               | N/A                | qRT-PCR, shMS4A3                                                                                                                                           |
| <b>AP/BP-CML</b>       | M019       | BP-CML            | None                             |                    | N/A                | qRT-PCR, immunoblot, ectopic MS4A3, shMS4A3, annexin V, colony assays, CFSE staining                                                                       |
|                        | M020       | BP-CML            | None                             |                    | N/A                | qRT-PCR, immunoblot, ectopic MS4A3, annexin V, colony assays                                                                                               |
|                        | M027       | AP-CML            | None                             |                    | N/A                | qRT-PCR, ectopic MS4A3, annexin V, colony assays                                                                                                           |
|                        | M033       | BP-CML            | None                             |                    | N/A                | qRT-PCR, immunoblot, ectopic MS4A3, shMS4A3, annexin V, colony assays, CFSE staining, DNA bisulfite conversion & patch PCR sequencing                      |
|                        | M039       | BP-CML            | None                             |                    | N/A                | qRT-PCR, immunoblot, ectopic MS4A3, annexin V, colony assays, DNA bisulfite conversion & patch PCR sequencing                                              |
|                        | M042       | AP-CML            | None                             |                    | N/A                | qRT-PCR, ectopic MS4A3, annexin V, DNA bisulfite conversion & patch PCR sequencing                                                                         |
|                        | M049       | BP-CML            | None                             |                    | N/A                | qRT-PCR, ectopic MS4A3, annexin V, 5-aza treatment                                                                                                         |
|                        | M050       | BP-CML            | None                             |                    | N/A                | qRT-PCR, ectopic MS4A3, annexin V, 5-aza treatment                                                                                                         |
|                        | M065       | BP-CML            | None                             |                    | N/A                | qRT-PCR, CFSE staining, differential sorting                                                                                                               |
| <b>TKI-R CML</b>       | M001       | TKI-R (CP-CML)    | None                             | IM, NIL, DAS       | Cytogenetic        | qRT-PCR                                                                                                                                                    |
|                        | M002       | TKI-R (AP-CML)    | None                             | NIL                | Cytogenetic        | qRT-PCR, DNA bisulfite conversion & patch PCR sequencing                                                                                                   |
|                        | M004       | TKI-R (CP-CML)    | None                             | IM, NIL, DAS       | Cytogenetic        | qRT-PCR                                                                                                                                                    |
|                        | M005       | TKI-R (CP-CML)    | E255K                            | IM, NIL, DAS       | Cytogenetic        | qRT-PCR, DNA bisulfite conversion & patch PCR sequencing                                                                                                   |
|                        | M006       | TKI-R (CP-CML)    | None                             | IM, NIL, DAS       | Cytogenetic        | qRT-PCR                                                                                                                                                    |
|                        | M007       | TKI-R (AP-CML)    | None                             | IM, DAS            | Cytogenetic        | qRT-PCR, DNA bisulfite conversion & patch PCR sequencing                                                                                                   |
|                        | M008       | TKI-R             | None                             |                    | Cytogenetic        | qRT-PCR                                                                                                                                                    |
|                        | M012       | TKI-R             | None                             |                    | Cytogenetic        | qRT-PCR, DNA bisulfite conversion & patch PCR sequencing                                                                                                   |
|                        | M013       | TKI-R (CP-CML)    | None                             | NIL, DAS           | Cytogenetic        | qRT-PCR, DNA bisulfite conversion & patch PCR sequencing                                                                                                   |
|                        | M015       | TKI-R (CP-CML)    | T315I                            | IM, DAS            | Cytogenetic        | qRT-PCR, DNA bisulfite conversion & patch PCR sequencing                                                                                                   |
| <b>Healthy Donors</b>  | M026       | CB                | N/A                              | N/A                |                    | qRT-PCR, immunoblot, ectopic MS4A3, shMS4A3, colony assays                                                                                                 |
|                        | M031       | CB                | N/A                              | N/A                |                    | qRT-PCR, CFSE staining                                                                                                                                     |
|                        | M032       | CB                | N/A                              | N/A                |                    | qRT-PCR                                                                                                                                                    |
|                        | M034       | CB                | N/A                              | N/A                |                    | qRT-PCR, CFSE staining                                                                                                                                     |

|      |    |     |     |                                                                                                             |
|------|----|-----|-----|-------------------------------------------------------------------------------------------------------------|
| M035 | CB | N/A | N/A | immunoblot                                                                                                  |
| M036 | CB | N/A | N/A | immunoblot                                                                                                  |
| M037 | CB | N/A | N/A | qRT-PCR, DNA bisulfite conversion & patch PCR sequencing                                                    |
| M038 | CB | N/A | N/A | qRT-PCR, immunoblot, ectopic MS4A3, shMS4A3, colony assays, DNA bisulfite conversion & patch PCR sequencing |
| M048 | CB | N/A | N/A | immunoblot                                                                                                  |
| M053 | FH | N/A | N/A | qRT-PCR                                                                                                     |
| M054 | FH | N/A | N/A | qRT-PCR, CFSE staining                                                                                      |
| M056 | CB | N/A | N/A | qRT-PCR, differential sorting                                                                               |
| M057 | CB | N/A | N/A | qRT-PCR, CD38 selection                                                                                     |
| M058 | CB | N/A | N/A | qRT-PCR, CD38 selection                                                                                     |
| M061 | CB | N/A | N/A | qRT-PCR, differential sorting                                                                               |
| M062 | CB | N/A | N/A | qRT-PCR, immunoblot, ectopic MS4A3, colony assays, CFSE staining                                            |
| M063 | CB | N/A | N/A | qRT-PCR, immunoblot, CFSE staining                                                                          |
| M067 | CB | N/A | N/A | qRT-PCR, CD38 selection                                                                                     |
| M068 | CB | N/A | N/A | qRT-PCR, CD38 selection                                                                                     |
| M069 | CB | N/A | N/A | qRT-PCR, CD38 selection                                                                                     |
| M070 | CB | N/A | N/A | qRT-PCR, DNA bisulfite conversion & patch PCR sequencing                                                    |
| M072 | CB | N/A | N/A | qRT-PCR                                                                                                     |
| M075 | CB | N/A | N/A | qRT-PCR, CD38 selection                                                                                     |
| M076 | CB | N/A | N/A | qRT-PCR, shMS4A3, CD38 selection                                                                            |
| M077 | CB | N/A | N/A | qRT-PCR, CD38 selection                                                                                     |

---

**Supplementary Table S2. Primer sequences**

| <b>Gene</b>         | <b>Forward Primer</b>       | <b>Reverse Primer</b>      |
|---------------------|-----------------------------|----------------------------|
| <b><i>Human</i></b> |                             |                            |
| BCR-ABL1            | GGT ACC AGG AGT GTT TCT CCA | GAG CGT GCA GAG TGG AGG GA |
| CEBPB               | GACAAGCACAGCGACGAGTA        | AGCTGCTCCACCTTCTTCTG       |
| CEBPE               | GCAAGAAGGCAGTGAACAAAG       | CTCTGCCATGTACTCCAGCA       |
| CSTA                | ATACCTGGAGGCTTATCTG         | CCAGTAAGTACCAAGTCCTCATT    |
| CTSG                | CCTGCTGTGTAACAATGTGG        | AAGGCTCTGGCAACACTGTG       |
| CXCR4               | GGTGGTCTATGTTGGCGTCT        | TGGAGTGTGACAGCTTGGAG       |
| EGR1                | GGGAGAGGCAGGAAAGACATAA      | TCTGAGATCTTCCATCTGACCTAAGA |
| G0S2                | CGTGCCACTAAGGTCATTCC        | GCACGTACAGCTTCACCATC       |
| GAS2                | GAAGGTTTGGTCCTCCACAA        | GAAGGAGAAGGGGCAGAAAG       |
| GUS                 | GAAAATATGTGGTTGGAGAGCTCATT  | CCGAGTGAAGATCCCCTTTTTA     |
| MECOM               | ACCAGCCCCTGGATCTAAGT        | TTCGACGTTGCTTCCTTTTT       |
| MS4A3               | AGCAGGGATAAAACCCACAA        | AATTGCATAGGTCCGGTGAC       |
| PLAUR               | GACCCTGAGCTATCGGACTG        | CATCCAGGCACTGTTCTTCA       |
| PRTN3               | ACGCGGAGAACAACACTGAAC       | GGGACGAAAGTGCAAATGTT       |
| PTPRE               | AGCACCAGCGACAAGAAGAT        | ATGTGTCCAGATGGCAATGA       |
| RNase3              | AGGTGAACTGGAACACAGG         | AGATTCCGGGTGCCTTTACT       |
| <b><i>Mouse</i></b> |                             |                            |
| Ms4a3               | TGCTGAGGAATTGCACAAAG        | ACCAGTCTCCTCTGGCTTCA       |
| Gapdh               | GGCATTGCTCTCAATGACAA        | TGTGAGGGAGATGCTCAGTG       |

**Supplementary Table S3. Antibodies**

| <b>Protein</b>                                                                             | <b>Source</b>             | <b>Catalog #</b> |
|--------------------------------------------------------------------------------------------|---------------------------|------------------|
| <b><i>Immunoblot</i></b>                                                                   |                           |                  |
| Rabbit anti-MS4A3                                                                          | Aviva Systems Biology     | ARP62012-P050    |
| Rabbit anti- $\alpha/\beta$ -tubulin                                                       | Cell Signaling Technology | 2148             |
| Rabbit anti-pCDK2 (Thr160)                                                                 | Cell Signaling Technology | 2561S            |
| <b><i>Immunofluorescent staining</i></b>                                                   |                           |                  |
| Rabbit anti-Rab4                                                                           | Invitrogen                | PA3-912          |
| Rabbit anti-Rab5                                                                           | Cell Signaling Technology | 3547             |
| Rabbit anti-Rab7                                                                           | Cell Signaling Technology | 9367             |
| Rabbit anti-Rab11                                                                          | Cell Signaling Technology | 5589             |
| Rabbit anti-LAMP1                                                                          | Cell Signaling Technology | 9091             |
| Rabbit anti-LC3B                                                                           | Cell Signaling Technology | 3868             |
| Rabbit anti-Clathrin                                                                       | Cell Signaling Technology | 4796             |
| Rabbit anti-Caveolin                                                                       | Cell Signaling Technology | 3267             |
| Rabbit anti-58K Golgi protein                                                              | Invitrogen                | PA5-83166        |
| Rabbit anti-alpha tubulin                                                                  | Cell Signaling Technology | 2125             |
| Alexa Fluor™ 594 Phalloidin                                                                | Invitrogen                | A12381           |
| Goat anti-Rabbit IgG (H+L) Highly<br>Cross-Adsorbed Secondary Antibody,<br>Alexa Fluor 647 | Invitrogen                | A-21245          |
| <b><i>Flow Cytometry</i></b>                                                               |                           |                  |
| APC anti-human CD45                                                                        | BioLegend                 | 368512           |
| FITC anti-human CD34                                                                       | eBioscience               | 11-0341-81       |
| APC anti-human CD38                                                                        | BioLegend                 | 102712           |
| BV421 anti-human CD117                                                                     | BD Biosciences            | 562435           |
| APC anti-human CD11b                                                                       | eBioscience               | 17-0112-82       |
| <b><i>ChIP</i></b>                                                                         |                           |                  |
| Rabbit anti-Histone H3K27me3                                                               | Active Motif              | 39155            |

**Supplementary Table S4. Patch Oligonucleotide Sequences****Patch\_L1**

| <b>Well Position</b> | <b>Name</b>              | <b>Sequence</b>                                          |
|----------------------|--------------------------|----------------------------------------------------------|
| A1                   | chr1:151958613-151958784 | ggctacttaacaaaggaggacctgaACTCCCCACCTTCCTCATTCTCT         |
| A2                   | chr1:151962717-151962873 | acatattttccttttgcgatggaatgtgACTCCCCACCTTCCTCATTCTCT      |
| A3                   | chr1:151966081-151966153 | gtggggaatccgctgctcaACTCCCCACCTTCCTCATTCTCT               |
| A4                   | chr1:151966154-151966313 | tgcccgggaaaaccctgACTCCCCACCTTCCTCATTCTCT                 |
| A5                   | chr1:151966314-151966577 | caccgcccgcacgtactaaACTCCCCACCTTCCTCATTCTCT               |
| A6                   | chr1:153329674-153329767 | ggcaattctgatgataccttctcttgACTCCCCACCTTCCTCATTCTCT        |
| A7                   | chr1:153329926-153330006 | ccttttagtccaacaaggatggtctgaACTCCCCACCTTCCTCATTCTCT       |
| A8                   | chr1:153330088-153330317 | tggtttagttcattcccttctatcctaaACTCCCCACCTTCCTCATTCTCT      |
| A9                   | chr1:153330318-153330500 | acagagtgttgcagagctgtgACTCCCCACCTTCCTCATTCTCT             |
| A10                  | chr1:153330768-153330894 | gcgtccagctgcgacatttgACTCCCCACCTTCCTCATTCTCT              |
| A11                  | chr1:153348337-153348415 | cctgggccctggctcaACTCCCCACCTTCCTCATTCTCT                  |
| A12                  | chr1:153362881-153363077 | aattgctagagaccgagtgctcaACTCCCCACCTTCCTCATTCTCT           |
| B1                   | chr1:153363139-153363248 | tgctggttggttatttgagagtgACTCCCCACCTTCCTCATTCTCT           |
| B2                   | chr1:153363438-153363550 | gaagtggagcagccttctgaACTCCCCACCTTCCTCATTCTCT              |
| B3                   | chr1:153363557-153363691 | cgctataaaaaggagctgcctctcaACTCCCCACCTTCCTCATTCTCT         |
| B4                   | chr1:161184287-161184369 | ggagacgagcaggaaaaattgctaaACTCCCCACCTTCCTCATTCTCT         |
| B5                   | chr1:161184396-161184474 | gtttaccaagttagtgggactgaACTCCCCACCTTCCTCATTCTCT           |
| B6                   | chr1:161184475-161184585 | ctgcccgtcaacattccctcaACTCCCCACCTTCCTCATTCTCT             |
| B7                   | chr1:161184586-161184671 | gctggtctgaactcctgatctcaACTCCCCACCTTCCTCATTCTCT           |
| B8                   | chr1:161184987-161185063 | ggcccttccccttctgACTCCCCACCTTCCTCATTCTCT                  |
| B9                   | chr1:161185076-161185223 | gccgttctgacagcactgtgACTCCCCACCTTCCTCATTCTCT              |
| B10                  | chr1:161186799-161186880 | cgaaaccaaggctcgaaaagctaaACTCCCCACCTTCCTCATTCTCT          |
| B11                  | chr1:161188811-161188906 | gccagctggtgtaatggcatgACTCCCCACCTTCCTCATTCTCT             |
| B12                  | chr1:186642099-186642206 | actctgcctatatttctacctgaactttgACTCCCCACCTTCCTCATTCTCT     |
| C1                   | chr1:186650355-186650456 | gctcacattaactattacagggtaactgcttaACTCCCCACCTTCCTCATTCTCT  |
| C2                   | chr1:209847625-209847712 | ttagctgtaatcacctgggctgaACTCCCCACCTTCCTCATTCTCT           |
| C3                   | chr1:209848398-209848506 | cttctactggtgtcagcgggtgACTCCCCACCTTCCTCATTCTCT            |
| C4                   | chr1:209848507-209848581 | cgtgggaaggccagtgtgACTCCCCACCTTCCTCATTCTCT                |
| C5                   | chr1:209848582-209848716 | gtggccacgcgctgaACTCCCCACCTTCCTCATTCTCT                   |
| C6                   | chr1:209848717-209848789 | ggggccgcttatatcttttctgtaACTCCCCACCTTCCTCATTCTCT          |
| C7                   | chr1:209848891-209848994 | gctcatagaaaggcgactaccttaACTCCCCACCTTCCTCATTCTCT          |
| C8                   | chr2:64677694-64677801   | ccgtgtactatggagatagtgaaaatgACTCCCCACCTTCCTCATTCTCT       |
| C9                   | chr2:64680293-64680366   | gtggcccaggctggagtgaACTCCCCACCTTCCTCATTCTCT               |
| C10                  | chr2:64683514-64683698   | cctctcccagatatacaagaatttctgaACTCCCCACCTTCCTCATTCTCT      |
| C11                  | chr2:64685929-64686047   | ggttggtactacacaattccacttagtgACTCCCCACCTTCCTCATTCTCT      |
| C12                  | chr2:113587642-113587785 | aaaccacggccacatttggttctaaACTCCCCACCTTCCTCATTCTCT         |
| D1                   | chr2:113593790-113593883 | cagccatggcagaagtacctgaACTCCCCACCTTCCTCATTCTCT            |
| D2                   | chr2:113594250-113594412 | tgactttaatcttcttacaactaggtgctaaACTCCCCACCTTCCTCATTCTCT   |
| D3                   | chr2:113594413-113594489 | tgaatcaggatttaacagagaaatttctcaACTCCCCACCTTCCTCATTCTCT    |
| D4                   | chr2:113594618-113594718 | gaaaatccagtagtttaatgtggacatcaactgACTCCCCACCTTCCTCATTCTCT |
| D5                   | chr2:136872117-136872217 | gctagaaatgatcccagctgtttatgACTCCCCACCTTCCTCATTCTCT        |
| D6                   | chr2:136873290-136873443 | ggtcatgggttaccagaagaaactgaACTCCCCACCTTCCTCATTCTCT        |
| D7                   | chr2:136873749-136873819 | ccaagatgtgacttgaaccctcaACTCCCCACCTTCCTCATTCTCT           |
| D8                   | chr2:136874486-136874584 | cccagcggagcccctgACTCCCCACCTTCCTCATTCTCT                  |
| D9                   | chr2:136874585-136874693 | ttgtagggagttttggttctctgACTCCCCACCTTCCTCATTCTCT           |
| D10                  | chr3:122044160-122044233 | tggcgggttggcctcaACTCCCCACCTTCCTCATTCTCT                  |
| D11                  | chr3:122058093-122058177 | ctggaagtagattaccctcattgtgACTCCCCACCTTCCTCATTCTCT         |
| D12                  | chr4:6695222-6695366     | tgctgacacgaggagacatctgaACTCCCCACCTTCCTCATTCTCT           |

|     |                          |                                                            |
|-----|--------------------------|------------------------------------------------------------|
| E1  | chr4:6695367-6695479     | gtctcggcgccatcactgaACTCCCCACCTTCCTCATTCTCT                 |
| E2  | chr4:6698030-6698255     | gcatggagcaagcacctgaACTCCCCACCTTCCTCATTCTCT                 |
| E3  | chr4:90815871-90815966   | gtgaagggtctctgacaaagctaaACTCCCCACCTTCCTCATTCTCT            |
| E4  | chr4:90816031-90816118   | gtgcttccacactgaatctgctaaACTCCCCACCTTCCTCATTCTCT            |
| E5  | chr4:90816279-90816377   | gaccgagtggttggcagtatttgACTCCCCACCTTCCTCATTCTCT             |
| E6  | chr4:90823160-90823235   | tgtcaggctttcccagcgtgACTCCCCACCTTCCTCATTCTCT                |
| E7  | chr4:90836562-90836635   | gctgatccctcaatatcaagtgaaaactgACTCCCCACCTTCCTCATTCTCT       |
| E8  | chr4:156549424-156549498 | ctttctgactggcccctcttctgACTCCCCACCTTCCTCATTCTCT             |
| E9  | chr4:156585604-156585709 | tgaatctttctaaattcagggatttttagaacctgACTCCCCACCTTCCTCATTCTCT |
| E10 | chr4:156587988-156588084 | cgaggaaaagtgtaggaaaactctgACTCCCCACCTTCCTCATTCTCT           |
| E11 | chr4:156588085-156588219 | cccggctggggtctctaaACTCCCCACCTTCCTCATTCTCT                  |
| E12 | chr4:156588586-156588666 | gaccgcgtggggatgACTCCCCACCTTCCTCATTCTCT                     |
| F1  | chr4:156589214-156589300 | acgaaaacagaaatgggactgctaaACTCCCCACCTTCCTCATTCTCT           |
| F2  | chr4:156589354-156589437 | agcctgaaatcacatgaccacattgACTCCCCACCTTCCTCATTCTCT           |
| F3  | chr5:88017774-88017907   | catatattaataataataataaactctgggtctgACTCCCCACCTTCCTCATTCTCT  |
| F4  | chr5:88017908-88018019   | catccaagaatgctcacaacactgACTCCCCACCTTCCTCATTCTCT            |
| F5  | chr5:88018385-88018459   | tcagattactactagtagtttttttttctgACTCCCCACCTTCCTCATTCTCT      |
| F6  | chr5:88018460-88018715   | ggacgaaagggaaagtccctcaACTCCCCACCTTCCTCATTCTCT              |
| F7  | chr6:130686016-130686122 | gggtgggggagagccatgACTCCCCACCTTCCTCATTCTCT                  |
| F8  | chr6:130686123-130686195 | gtgatagaaggcaagatgatattctgggtgACTCCCCACCTTCCTCATTCTCT      |
| F9  | chr6:130690524-130690712 | aacctatgtctctctctgtttactcaACTCCCCACCTTCCTCATTCTCT          |
| F10 | chr6:130747455-130747602 | gtcctgtttcatcttttgcgtgctgACTCCCCACCTTCCTCATTCTCT           |
| F11 | chr6:130757713-130757869 | tctagaatgagtgaaactacaggctctgACTCCCCACCTTCCTCATTCTCT        |
| F12 | chr6:130758118-130758262 | atgggatgctaacggcagttgACTCCCCACCTTCCTCATTCTCT               |
| G1  | chr6:132987332-132987408 | ggtctgttcatggtattcaaaactgaACTCCCCACCTTCCTCATTCTCT          |
| G2  | chr6:132987409-132987478 | ggcaagacaaagtcatctgaatttgattgACTCCCCACCTTCCTCATTCTCT       |
| G3  | chr6:132987492-132987573 | ggaggaaggtaatctaaaaaagagtcctgACTCCCCACCTTCCTCATTCTCT       |
| G4  | chr6:133003614-133003784 | agaggaaggacaactcttacaagctaaACTCCCCACCTTCCTCATTCTCT         |
| G5  | chr6:133004825-133004937 | agagacaggagatgacagatgctcaACTCCCCACCTTCCTCATTCTCT           |
| G6  | chr6:133035164-133035249 | tcattggacttcagatgactactcaACTCCCCACCTTCCTCATTCTCT           |
| G7  | chr6:133035250-133035333 | gtttcttaattaactcctgtagtttaaggtactaaACTCCCCACCTTCCTCATTCTCT |
| G8  | chr6:133035334-133035444 | acatagagtcttgagttaatcttcacaaactgACTCCCCACCTTCCTCATTCTCT    |
| G9  | chr7:150211739-150211909 | tttccttcaggttatagtgatggatgACTCCCCACCTTCCTCATTCTCT          |
| G10 | chr7:150323041-150323184 | cgatcaatttcccattgaactgaacatgACTCCCCACCTTCCTCATTCTCT        |
| G11 | chr7:150328732-150328802 | agggaggtgccttgcgtgACTCCCCACCTTCCTCATTCTCT                  |
| G12 | chr8:30209251-30209362   | ccaggctgatctcaaactcctgaACTCCCCACCTTCCTCATTCTCT             |
| H1  | chr8:30209363-30209450   | gcaggaagttctcgacacctcaACTCCCCACCTTCCTCATTCTCT              |
| H2  | chr8:30209451-30209538   | cggggcaagaaaataagtaatttttttctgACTCCCCACCTTCCTCATTCTCT      |
| H3  | chr8:30209539-30209649   | gctgaccagcctggatgtgACTCCCCACCTTCCTCATTCTCT                 |
| H4  | chr8:30210276-30210522   | gggacctgttaactgccaactgACTCCCCACCTTCCTCATTCTCT              |
| H5  | chr8:30262205-30262359   | cccgggaggtggagttgACTCCCCACCTTCCTCATTCTCT                   |
| H6  | chr8:30264605-30264707   | acgtgactgctattcaggagactgaACTCCCCACCTTCCTCATTCTCT           |
| H7  | chr8:30272512-30272647   | acaaaggacaccatccatgggaatgACTCCCCACCTTCCTCATTCTCT           |
| H8  | chr8:30279880-30279964   | ccccagcacttgaaggctgaACTCCCCACCTTCCTCATTCTCT                |
| H9  | chr8:30279965-30280034   | ctgggtaacatagcaagacctctattactaaACTCCCCACCTTCCTCATTCTCT     |
| H10 | chr8:48648672-48648902   | gcaaatatccgactgactgctcttaACTCCCCACCTTCCTCATTCTCT           |
| H11 | chr8:48649023-48649130   | cgggactttgcttctctcaACTCCCCACCTTCCTCATTCTCT                 |
| H12 | chr8:48649131-48649216   | gggggcccctgctgaACTCCCCACCTTCCTCATTCTCT                     |

## Patch\_L2

| Well Position | Name                    | Sequence                                                   |
|---------------|-------------------------|------------------------------------------------------------|
| A1            | chr8:48649309-48649539  | gcaggcccgagctactcaACTCCCCACCTTCCTCATTCTCT                  |
| A2            | chr8:48649623-48649763  | agctttttctacatcttactcctgttgatgACTCCCCACCTTCCTCATTCTCT      |
| A3            | chr11:59822619-59822847 | ggccccagttgccagaaaatttctgACTCCCCACCTTCCTCATTCTCT           |
| A4            | chr11:59824073-59824143 | ccacagacttaacggttatctttgccttatgACTCCCCACCTTCCTCATTCTCT     |
| A5            | chr11:59824144-59824297 | cttgtcgcaagtaggagacactcaACTCCCCACCTTCCTCATTCTCT            |
| A6            | chr12:69743601-69743702 | ccgtgctccccacctcaACTCCCCACCTTCCTCATTCTCT                   |
| A7            | chr13:31256700-31256846 | cttgaagatcccctcaaagggtctcaACTCCCCACCTTCCTCATTCTCT          |
| A8            | chr13:31264669-31264779 | ctttcccctctgctccctcaACTCCCCACCTTCCTCATTCTCT                |
| A9            | chr13:31305958-31306085 | cagaatccggagccgctgaACTCCCCACCTTCCTCATTCTCT                 |
| A10           | chr13:31306157-31306256 | cgcgcacattaagattctggctgACTCCCCACCTTCCTCATTCTCT             |
| A11           | chr13:31308427-31308520 | caatgccctcggttcagctgaACTCCCCACCTTCCTCATTCTCT               |
| A12           | chr13:31308521-31308612 | ggcagcagggagggtgACTCCCCACCTTCCTCATTCTCT                    |
| B1            | chr14:25042640-25042723 | acaaatttattctcacaggtctagaggctaaACTCCCCACCTTCCTCATTCTCT     |
| B2            | chr14:25043403-25043546 | ggagagagggggcccgtgACTCCCCACCTTCCTCATTCTCT                  |
| B3            | chr14:25043773-25043883 | ggagggcatgggatgtgtactgACTCCCCACCTTCCTCATTCTCT              |
| B4            | chr14:25044917-25045008 | gcaaagcattctcctcaatacctgaACTCCCCACCTTCCTCATTCTCT           |
| B5            | chr14:25045492-25045582 | ccacccttctctctctcaACTCCCCACCTTCCTCATTCTCT                  |
| B6            | chr14:25045583-25045665 | cagtttggggcaaaactcctgaACTCCCCACCTTCCTCATTCTCT              |
| B7            | chr14:94854933-94855052 | gacagggccctgtctcctcaACTCCCCACCTTCCTCATTCTCT                |
| B8            | chr14:94855161-94855233 | cacaggacgctgtggtttctgaACTCCCCACCTTCCTCATTCTCT              |
| B9            | chr17:53340951-53341040 | ggcaaaagggttaaggcaacattctaaACTCCCCACCTTCCTCATTCTCT         |
| B10           | chr17:53341041-53341201 | gcaagtgcctttctgccctgaACTCCCCACCTTCCTCATTCTCT               |
| B11           | chr17:53341202-53341275 | cctttgtgaccccaggctgaACTCCCCACCTTCCTCATTCTCT                |
| B12           | chr17:53341569-53341721 | gcgcttgggtcaagttattaggtttgACTCCCCACCTTCCTCATTCTCT          |
| C1            | chr17:53341848-53342046 | ggccccggccaagcttaACTCCCCACCTTCCTCATTCTCT                   |
| C2            | chr17:53342047-53342128 | catagttttcaagctgggaataacctgaACTCCCCACCTTCCTCATTCTCT        |
| C3            | chr17:53342679-53342771 | agaaaaaattactatatactttataaatacatctgACTCCCCACCTTCCTCATTCTCT |
| C4            | chr17:53342910-53343164 | gttctccagcagggacctgaACTCCCCACCTTCCTCATTCTCT                |
| C5            | chr17:53345556-53345685 | ggagcagaagaaggtacctcttaACTCCCCACCTTCCTCATTCTCT             |
| C6            | chr17:56345755-56345894 | gtttttgagcacttcaatgtgctgtgACTCCCCACCTTCCTCATTCTCT          |
| C7            | chr17:56349058-56349181 | ggcccactctcgctgACTCCCCACCTTCCTCATTCTCT                     |
| C8            | chr17:56352856-56353022 | cgggatccagatgtgtccctgACTCCCCACCTTCCTCATTCTCT               |
| C9            | chr17:56354467-56354732 | accagacattttcagtgtttttttttctaaACTCCCCACCTTCCTCATTCTCT      |
| C10           | chr17:56355246-56355465 | ctgctgcccttgacaacctgACTCCCCACCTTCCTCATTCTCT                |
| C11           | chr17:56356893-56357035 | gcacatcaccgggatgtgACTCCCCACCTTCCTCATTCTCT                  |
| C12           | chr18:61553980-61554107 | cgtgttaagtccccctttgtccttaACTCCCCACCTTCCTCATTCTCT           |
| D1            | chr18:61557698-61557783 | gctgtatgttttctttcatcatagcttgACTCCCCACCTTCCTCATTCTCT        |
| D2            | chr19:826530-826639     | cgaaatgtccagaacaagcaaatctgACTCCCCACCTTCCTCATTCTCT          |
| D3            | chr19:827348-827467     | ttgttcccaggctggagtgACTCCCCACCTTCCTCATTCTCT                 |
| D4            | chr19:827468-827539     | gcaccgggggctcaACTCCCCACCTTCCTCATTCTCT                      |
| D5            | chr19:827570-827660     | cagcacatggcggcatgACTCCCCACCTTCCTCATTCTCT                   |
| D6            | chr19:827673-827749     | ctgggctccccctacattctgACTCCCCACCTTCCTCATTCTCT               |
| D7            | chr19:827750-827824     | caggacagccccactcaACTCCCCACCTTCCTCATTCTCT                   |
| D8            | chr19:827825-827967     | ggggcaggtctgtggctaaACTCCCCACCTTCCTCATTCTCT                 |
| D9            | chr19:839649-839771     | ctcctggcagggccctgACTCCCCACCTTCCTCATTCTCT                   |
| D10           | chr19:840607-840754     | gacgtagcaggggacaggatgACTCCCCACCTTCCTCATTCTCT               |
| D11           | chr19:840755-840992     | caacatggccacagccctcaACTCCCCACCTTCCTCATTCTCT                |
| D12           | chr19:840993-841063     | catggtgggtccagggtgACTCCCCACCTTCCTCATTCTCT                  |

|    |                         |                                                 |
|----|-------------------------|-------------------------------------------------|
| E1 | chr19:841064-841176     | gtggctcactcaccgctcaACTCCCCACCTTCCTCATTCTCT      |
| E2 | chr19:44152949-44153103 | ctacagacttgctgtgacctaACTCCCCACCTTCCTCATTCTCT    |
| E3 | chr19:44159620-44159775 | acaccttcacttcctgaaatgctgACTCCCCACCTTCCTCATTCTCT |
| E4 | chr19:44173928-44174036 | gtcgcccaggctggagtACTCCCCACCTTCCTCATTCTCT        |
| E5 | chr20:48805984-48806131 | cctctgctggtaggctcaACTCCCCACCTTCCTCATTCTCT       |



**Patch\_R1**

| <b>Well Position</b> | <b>Name</b>              | <b>Sequence</b>                                         |
|----------------------|--------------------------|---------------------------------------------------------|
| A1                   | chr1:151958613-151958784 | AACACCAACTACCTCCCACACTcataaagtctgccccaaaaaagttaatgtagac |
| A2                   | chr1:151962717-151962873 | AACACCAACTACCTCCCACACTgcagtgagatagcagcactagaaa          |
| A3                   | chr1:151966081-151966153 | AACACCAACTACCTCCCACACTcaccggcttcgcg                     |
| A4                   | chr1:151966154-151966313 | AACACCAACTACCTCCCACACTggaaggcgcacagcc                   |
| A5                   | chr1:151966314-151966577 | AACACCAACTACCTCCCACACTgggtgggatgccctg                   |
| A6                   | chr1:153329674-153329767 | AACACCAACTACCTCCCACACTgcaaggtcacatagctggtg              |
| A7                   | chr1:153329926-153330006 | AACACCAACTACCTCCCACACTggacctatggggcctga                 |
| A8                   | chr1:153330088-153330317 | AACACCAACTACCTCCCACACTcaggtcggcatttataggag              |
| A9                   | chr1:153330318-153330500 | AACACCAACTACCTCCCACACTgaaaatgtgaaagaagctttaaagtagg      |
| A10                  | chr1:153330768-153330894 | AACACCAACTACCTCCCACACTcagatcttttcgaccagctctt            |
| A11                  | chr1:153348337-153348415 | AACACCAACTACCTCCCACACTggctgtaaagttgttctctagtct          |
| A12                  | chr1:153362881-153363077 | AACACCAACTACCTCCCACACTcaaattccctgcatgggattcc            |
| B1                   | chr1:153363139-153363248 | AACACCAACTACCTCCCACACTcacatgtctctgtgtaaggacc            |
| B2                   | chr1:153363438-153363550 | AACACCAACTACCTCCCACACTcatgtctctgtcagctgtcttc            |
| B3                   | chr1:153363557-153363691 | AACACCAACTACCTCCCACACTcacagtgattgccacattcacct           |
| B4                   | chr1:161184287-161184369 | AACACCAACTACCTCCCACACTggcgaaaggagaaatggggaaatag         |
| B5                   | chr1:161184396-161184474 | AACACCAACTACCTCCCACACTgacccactatagccctttcc              |
| B6                   | chr1:161184475-161184585 | AACACCAACTACCTCCCACACTggtgatccatccgcctcg                |
| B7                   | chr1:161184586-161184671 | AACACCAACTACCTCCCACACTcaccaccagcccg                     |
| B8                   | chr1:161184987-161185063 | AACACCAACTACCTCCCACACTgcgagcagttccctgacc                |
| B9                   | chr1:161185076-161185223 | AACACCAACTACCTCCCACACTgaccaagctctggacttcc               |
| B10                  | chr1:161186799-161186880 | AACACCAACTACCTCCCACACTcacaaatcttaaactaccctgtgagg        |
| B11                  | chr1:161188811-161188906 | AACACCAACTACCTCCCACACTgcattagtctttaaaggaggagg           |
| B12                  | chr1:186642099-186642206 | AACACCAACTACCTCCCACACTgagacacagctcttcatcactctg          |
| C1                   | chr1:186650355-186650456 | AACACCAACTACCTCCCACACTcaaattctggccatcgccg               |
| C2                   | chr1:209847625-209847712 | AACACCAACTACCTCCCACACTgtaagaatccagagtgtgagtactc         |
| C3                   | chr1:209848398-209848506 | AACACCAACTACCTCCCACACTcacgcgaaggtcccactc                |
| C4                   | chr1:209848507-209848581 | AACACCAACTACCTCCCACACTgcacgctccgactgtgt                 |
| C5                   | chr1:209848582-209848716 | AACACCAACTACCTCCCACACTgacacgctcctgggc                   |
| C6                   | chr1:209848717-209848789 | AACACCAACTACCTCCCACACTcagctctcccagttggagact             |
| C7                   | chr1:209848891-209848994 | AACACCAACTACCTCCCACACTcaggaggagcagcaggaga               |
| C8                   | chr2:64677694-64677801   | AACACCAACTACCTCCCACACTcacatggaatttctaataatgggaggaag     |
| C9                   | chr2:64680293-64680366   | AACACCAACTACCTCCCACACTgaggctccttttttttttttttttttt       |
| C10                  | chr2:64683514-64683698   | AACACCAACTACCTCCCACACTcagaaattctggctgctcaagtg           |
| C11                  | chr2:64685929-64686047   | AACACCAACTACCTCCCACACTcaaaacaaaaacaaaaacaaaaacaaaa      |
| C12                  | chr2:113587642-113587785 | AACACCAACTACCTCCCACACTgaggatctctgtccatcagcc             |
| D1                   | chr2:113593790-113593883 | AACACCAACTACCTCCCACACTgagaaatcacacatgaacgtagcc          |
| D2                   | chr2:113594250-113594412 | AACACCAACTACCTCCCACACTgcctctacttctgttttgaag             |
| D3                   | chr2:113594413-113594489 | AACACCAACTACCTCCCACACTgaagctccaccaataactctttcc          |
| D4                   | chr2:113594618-113594718 | AACACCAACTACCTCCCACACTcatgtataaatctgtgtcttccactt        |
| D5                   | chr2:136872117-136872217 | AACACCAACTACCTCCCACACTgttgctgtatgtctctgttagga           |
| D6                   | chr2:136873290-136873443 | AACACCAACTACCTCCCACACTggggactatgactccatgaaggaa          |
| D7                   | chr2:136873749-136873819 | AACACCAACTACCTCCCACACTggaaggttttttcttccctctagt          |
| D8                   | chr2:136874486-136874584 | AACACCAACTACCTCCCACACTcagcggcgcgaattc                   |
| D9                   | chr2:136874585-136874693 | AACACCAACTACCTCCCACACTcaagtggggaaccgtttgg               |
| D10                  | chr3:122044160-122044233 | AACACCAACTACCTCCCACACTgacttttctgaaatggcatcaact          |
| D11                  | chr3:122058093-122058177 | AACACCAACTACCTCCCACACTcatagtgaattataagtctcaataaattccagc |
| D12                  | chr4:6695222-6695366     | AACACCAACTACCTCCCACACTgccacagtggcatcctcattc             |
| E1                   | chr4:6695367-6695479     | AACACCAACTACCTCCCACACTcatcgttgatgacgtttctgga            |
| E2                   | chr4:6698030-6698255     | AACACCAACTACCTCCCACACTcactgctaactcatgggcctc             |
| E3                   | chr4:90815871-90815966   | AACACCAACTACCTCCCACACTggaagttcggtttctgttctgt            |

|     |                          |                                                        |
|-----|--------------------------|--------------------------------------------------------|
| E4  | chr4:90816031-90816118   | AACACCAACTACCTCCCACACTgtagtttgaagcaaggtagctcatg        |
| E5  | chr4:90816279-90816377   | AACACCAACTACCTCCCACACTgggaggcagtggtgatttaagaag         |
| E6  | chr4:90823160-90823235   | AACACCAACTACCTCCCACACTcaaaactgtgacttgagcatattccg       |
| E7  | chr4:90836562-90836635   | AACACCAACTACCTCCCACACTgaaccagaaaaaccttctgtgtgg         |
| E8  | chr4:156549424-156549498 | AACACCAACTACCTCCCACACTcatttatctaggtcaggcctccat         |
| E9  | chr4:156585604-156585709 | AACACCAACTACCTCCCACACTcacattaaagtttgaaaagcactggtc      |
| E10 | chr4:156587988-156588084 | AACACCAACTACCTCCCACACTgctcctccaggcgctc                 |
| E11 | chr4:156588085-156588219 | AACACCAACTACCTCCCACACTcagttcctttccataaggcattcg         |
| E12 | chr4:156588586-156588666 | AACACCAACTACCTCCCACACTggagaggaaggagaccagc              |
| F1  | chr4:156589214-156589300 | AACACCAACTACCTCCCACACTcagacaggcgaggagac                |
| F2  | chr4:156589354-156589437 | AACACCAACTACCTCCCACACTcaaatgaaagaataaacatgtgaaatcagt   |
| F3  | chr5:88017774-88017907   | AACACCAACTACCTCCCACACTcaggcatatcattggcgatggc           |
| F4  | chr5:88017908-88018019   | AACACCAACTACCTCCCACACTcaacatatagaaaaatgtatagatgcttgaca |
| F5  | chr5:88018385-88018459   | AACACCAACTACCTCCCACACTgtcaagcgcatgcgactttc             |
| F6  | chr5:88018460-88018715   | AACACCAACTACCTCCCACACTgagttcaaatctctccctgccttc         |
| F7  | chr6:130686016-130686122 | AACACCAACTACCTCCCACACTcagtgattttgtttatttcggcgtgt       |
| F8  | chr6:130686123-130686195 | AACACCAACTACCTCCCACACTcacaaggtgtgtgatgctgt             |
| F9  | chr6:130690524-130690712 | AACACCAACTACCTCCCACACTgaggaggatggggcacagaa             |
| F10 | chr6:130747455-130747602 | AACACCAACTACCTCCCACACTcagaaaggattcttctccttaacctaattaca |
| F11 | chr6:130757713-130757869 | AACACCAACTACCTCCCACACTcagtgagttatgatcatgccactact       |
| F12 | chr6:130758118-130758262 | AACACCAACTACCTCCCACACTcaattatacacatctgcatggagtt        |
| G1  | chr6:132987332-132987408 | AACACCAACTACCTCCCACACTcagggtcaaaattagaatgtcaaccct      |
| G2  | chr6:132987409-132987478 | AACACCAACTACCTCCCACACTcaaatgggccttacgaagtggaa          |
| G3  | chr6:132987492-132987573 | AACACCAACTACCTCCCACACTcagtatatttagtctgtggaaaaactgaag   |
| G4  | chr6:133003614-133003784 | AACACCAACTACCTCCCACACTgaaatgtgactgtatttgagacaggg       |
| G5  | chr6:133004825-133004937 | AACACCAACTACCTCCCACACTcaagttctcctcccactccc             |
| G6  | chr6:133035164-133035249 | AACACCAACTACCTCCCACACTgttctggacaccacgtgtcttc           |
| G7  | chr6:133035250-133035333 | AACACCAACTACCTCCCACACTcaataaggtagggtctttgttatgtaacaa   |
| G8  | chr6:133035334-133035444 | AACACCAACTACCTCCCACACTcaagcaataaattttttatttttacaccacc  |
| G9  | chr7:150211739-150211909 | AACACCAACTACCTCCCACACTggctgggtggagccac                 |
| G10 | chr7:150323041-150323184 | AACACCAACTACCTCCCACACTgaaagcttcagcatttctctgt           |
| G11 | chr7:150328732-150328802 | AACACCAACTACCTCCCACACTcacactgtggccaacatgg              |
| G12 | chr8:30209251-30209362   | AACACCAACTACCTCCCACACTgcttctgagtagccgggacta            |
| H1  | chr8:30209363-30209450   | AACACCAACTACCTCCCACACTcaggtcgcaggctggaag               |
| H2  | chr8:30209451-30209538   | AACACCAACTACCTCCCACACTcacgatttccctcatggttaaaatattaattt |
| H3  | chr8:30209539-30209649   | AACACCAACTACCTCCCACACTcaggtcgtgtccccg                  |
| H4  | chr8:30210276-30210522   | AACACCAACTACCTCCCACACTcacgttaaacatctgctcatcgac         |
| H5  | chr8:30262205-30262359   | AACACCAACTACCTCCCACACTggtcaggagttcagattagcct           |
| H6  | chr8:30264605-30264707   | AACACCAACTACCTCCCACACTggagttcaagaccagcctgg             |
| H7  | chr8:30272512-30272647   | AACACCAACTACCTCCCACACTcaggttagatggtgggataaggg          |
| H8  | chr8:30279880-30279964   | AACACCAACTACCTCCCACACTgaaaatttagtattattatttaagaaaatttc |
| H9  | chr8:30279965-30280034   | AACACCAACTACCTCCCACACTggcaggaggactgcttaagc             |
| H10 | chr8:48648672-48648902   | AACACCAACTACCTCCCACACTcagtgcttaagatttaaaaaagccgc       |
| H11 | chr8:48649023-48649130   | AACACCAACTACCTCCCACACTgaacagttcaagagctccctaact         |
| H12 | chr8:48649131-48649216   | AACACCAACTACCTCCCACACTggtaagctagcagctttccagc           |

**Patch\_R2**

| <b>Well Position</b> | <b>Name</b>             | <b>Sequence</b>                                          |
|----------------------|-------------------------|----------------------------------------------------------|
| A1                   | chr8:48649309-48649539  | AACACCAACTACCTCCCACACTgcatgctcactttttatattaatttttacagtat |
| A2                   | chr8:48649623-48649763  | AACACCAACTACCTCCCACACTcagtttcttgggacataggagcg            |
| A3                   | chr11:59822619-59822847 | AACACCAACTACCTCCCACACTgagaaagaatgagggcacagcc             |
| A4                   | chr11:59824073-59824143 | AACACCAACTACCTCCCACACTgaaaagatcactacagcatcttttccc        |
| A5                   | chr11:59824144-59824297 | AACACCAACTACCTCCCACACTcagacatccccagtagtccactg            |
| A6                   | chr12:69743601-69743702 | AACACCAACTACCTCCCACACTcaaatacatcttgaacaccaacgaaca        |
| A7                   | chr13:31256700-31256846 | AACACCAACTACCTCCCACACTcattcagttaggttcattatcacacactc      |
| A8                   | chr13:31264669-31264779 | AACACCAACTACCTCCCACACTcactccgcggtcgc                     |
| A9                   | chr13:31305958-31306085 | AACACCAACTACCTCCCACACTgacagaacaaaaagacaaggggca           |
| A10                  | chr13:31306157-31306256 | AACACCAACTACCTCCCACACTcagagggcccggtg                     |
| A11                  | chr13:31308427-31308520 | AACACCAACTACCTCCCACACTcatctcggcacggaagagg                |
| A12                  | chr13:31308521-31308612 | AACACCAACTACCTCCCACACTgctatttggcattggtaagaggt            |
| B1                   | chr14:25042640-25042723 | AACACCAACTACCTCCCACACTgtttgttgattgctacaacaaaatagc        |
| B2                   | chr14:25043403-25043546 | AACACCAACTACCTCCCACACTcagagggataggcagtgctc               |
| B3                   | chr14:25043773-25043883 | AACACCAACTACCTCCCACACTcaggtaccacctacctggc                |
| B4                   | chr14:25044917-25045008 | AACACCAACTACCTCCCACACTgagggtctggaagctc                   |
| B5                   | chr14:25045492-25045582 | AACACCAACTACCTCCCACACTgcagccttgggtgatgaaac               |
| B6                   | chr14:25045583-25045665 | AACACCAACTACCTCCCACACTgcagctgctcaagagctcac               |
| B7                   | chr14:94854933-94855052 | AACACCAACTACCTCCCACACTgccctgtttgctcctcc                  |
| B8                   | chr14:94855161-94855233 | AACACCAACTACCTCCCACACTgtggtactctcccagagactgtc            |
| B9                   | chr17:53340951-53341040 | AACACCAACTACCTCCCACACTgctgtaggttctcataaaaggacac          |
| B10                  | chr17:53341041-53341201 | AACACCAACTACCTCCCACACTgtcgtggggaaggtatgtg                |
| B11                  | chr17:53341202-53341275 | AACACCAACTACCTCCCACACTcaagaacgaatgggcacaaatgaa           |
| B12                  | chr17:53341569-53341721 | AACACCAACTACCTCCCACACTcagagaggtttaacgggtggg              |
| C1                   | chr17:53341848-53342046 | AACACCAACTACCTCCCACACTggagtttaaaaaaatcgcgataccca         |
| C2                   | chr17:53342047-53342128 | AACACCAACTACCTCCCACACTgatttttttttttttttggctgggtgg        |
| C3                   | chr17:53342679-53342771 | AACACCAACTACCTCCCACACTgcttttctccgtcctttgc                |
| C4                   | chr17:53342910-53343164 | AACACCAACTACCTCCCACACTggaggggtcctcccc                    |
| C5                   | chr17:53345556-53345685 | AACACCAACTACCTCCCACACTcaaaatcagaattttaggggtagatacaag     |
| C6                   | chr17:56345755-56345894 | AACACCAACTACCTCCCACACTgtggttaagacatgatggcctgta           |
| C7                   | chr17:56349058-56349181 | AACACCAACTACCTCCCACACTggaacctgaaattggcgaggaaa            |
| C8                   | chr17:56352856-56353022 | AACACCAACTACCTCCCACACTcacaccttactcgggag                  |
| C9                   | chr17:56354467-56354732 | AACACCAACTACCTCCCACACTgcbgtgctaaccacatttcaaatg           |
| C10                  | chr17:56355246-56355465 | AACACCAACTACCTCCCACACTcatcccgttctccgctcc                 |
| C11                  | chr17:56356893-56357035 | AACACCAACTACCTCCCACACTgctccccattgttctttccc               |
| C12                  | chr18:61553980-61554107 | AACACCAACTACCTCCCACACTcactccagcctgggtgac                 |
| D1                   | chr18:61557698-61557783 | AACACCAACTACCTCCCACACTcatgctcacaccaaggtgtg               |
| D2                   | chr19:826530-826639     | AACACCAACTACCTCCCACACTcactccagcctgggtgac                 |
| D3                   | chr19:827348-827467     | AACACCAACTACCTCCCACACTgggcagtgagctggc                    |
| D4                   | chr19:827468-827539     | AACACCAACTACCTCCCACACTgagtcccagttccccatcc                |
| D5                   | chr19:827570-827660     | AACACCAACTACCTCCCACACTgtttccctcttagaatggcca              |
| D6                   | chr19:827673-827749     | AACACCAACTACCTCCCACACTgtgggaacacgggaattgc                |
| D7                   | chr19:827750-827824     | AACACCAACTACCTCCCACACTggcggcggtcgc                       |
| D8                   | chr19:827825-827967     | AACACCAACTACCTCCCACACTgttctgcctggcagc                    |
| D9                   | chr19:839649-839771     | AACACCAACTACCTCCCACACTgagtcttgggtctgtggaat               |
| D10                  | chr19:840607-840754     | AACACCAACTACCTCCCACACTgagcaacacatgccacgt                 |
| D11                  | chr19:840755-840992     | AACACCAACTACCTCCCACACTcaccacgggtcaagctcc                 |

|     |                         |                                                  |
|-----|-------------------------|--------------------------------------------------|
| D12 | chr19:840993-841063     | AACACCAACTACCCTCCCACACTgcagcaaggccagcag          |
| E1  | chr19:841064-841176     | AACACCAACTACCCTCCCACACTgtttcccagctgtgcca         |
| E2  | chr19:44152949-44153103 | AACACCAACTACCCTCCCACACTgcctcaccatcacctgc         |
| E3  | chr19:44159620-44159775 | AACACCAACTACCCTCCCACACTgtccctcattcacaatctgacatct |
| E4  | chr19:44173928-44174036 | AACACCAACTACCCTCCCACACTggaaatattagtgagcaaaggcat  |
| E5  | chr20:48805984-48806131 | AACACCAACTACCCTCCCACACTcaccgaggttcaactttttca     |
